# Supplementary material
Source: PubMed Central journal article supplement (PMC3356612)
Supplement: 1114546109_sapp.pdf [file 1114546109_sapp.pdf]

## Supporting Information

### Contents

|                                                                                                                               |    |
|-------------------------------------------------------------------------------------------------------------------------------|----|
| Sequencing depth strategy .....                                                                                               | 2  |
| Library preparation .....                                                                                                     | 2  |
| Alignment and mapping .....                                                                                                   | 3  |
| Allele calling and SNP filtering .....                                                                                        | 4  |
| Linear model for allele frequency difference in Chief descendants and non-descendants.....                                    | 5  |
| Table S1. Mapping statistics.....                                                                                             | 6  |
| Table S2. <i>De novo</i> assembly and mapping of reads with no Newbler or BLAT hits against Btau4.0.....                      | 7  |
| Table S3. SNP detection and filtering statistics.....                                                                         | 8  |
| Table S4. Comparison between genotyped and sequence-based SNPs .....                                                          | 9  |
| Table S5. Agreement in allele phasing for haplotypes defined by 454 Sequencing and SNP50 genotyping.....                      | 10 |
| Table S6. Statistics on the length of tracked segments in descendants of Chief.....                                           | 11 |
| Table S7. Genes with mutations in 49 selected regions.....                                                                    | 12 |
| Table S8. Genes within 32 regions with the frequency of Chief alleles different between descendants and non-descendants ..... | 16 |
| Figure S1.....                                                                                                                | 18 |
| Figure S2.....                                                                                                                | 19 |
| Figure S3.....                                                                                                                | 20 |
| Figure S4.....                                                                                                                | 21 |
| Figure S5.....                                                                                                                | 22 |
| Figure S6.....                                                                                                                | 23 |
| Figure S7.....                                                                                                                | 24 |
| Figure S8.....                                                                                                                | 25 |

### **Sequencing depth strategy**

We determined the probability of detecting an allele if heterozygous or homozygous in each of two first-order relatives given a combined total of 18x coverage, and defined the probability of detecting alleles shared between these relatives at different sequencing depths. Alleles that were heterozygous in one individual and homozygous in the other were informative for reconstruction of the shared chromosomal haplotypes.

The probability of detecting an informative SNP for the haplotype reconstruction (heterozygous in one bull, homozygous in the other) at 6x Chief/12x Mark coverage was determined to be ~85%. We considered cases where one bull was homozygous and one heterozygous at a particular SNP and assumed that either bull was equally likely to be the heterozygous one. Then we assumed that the number of reads for Mark at a particular site was Poisson distributed with mean = 13.5 and calculated the probability that both alleles were observed at least 3 times. This is 93%. The equivalent calculation for Chief was the probability of observing each allele at least twice given an average read depth of 7.3 times which was 77%. Therefore the average across the two bulls was 85%. The different X chromosomes of Mark and Chief (inherited from different mothers) would be covered at .5x of their respective sequencing depths whereas the shared Y chromosome would be sequenced at ~9x. Because of the different maternal origins of the X (not part of the shared genome of the two bulls) we did not consider the X chromosome for analysis. The Y chromosome also was not analyzed because a complete Y assembly was not available at the time the sequence analysis was performed.

### **Library preparation**

Briefly, 5 µg of the DNA sample from each bull were nebulized for 1 min and fragments of 300-500 bp were selected using a gel cut method. The DNA quality was assessed on a BioAnalyzer DNA 7500 LabChip followed by fragment-end polishing and adaptor ligation. Small fragments were removed after incubation of the DNA with the AMPure beads. Large fragments of the adaptor-ligated DNA were immobilized using library immobilization beads and a single-stranded DNA library was generated in NaOH (10 N) solution. After quality assessment and quantification, the library was diluted to  $1 \times 10^8$  molecules/µl in TE Buffer and stored at -25°C until used.

## Alignment and mapping

Reads from the same tier of the same run that had the same size  $\pm 2$  bp and the same alignment coordinates were considered as duplicate reads produced from the rare accidental inclusion of two beads within a single emulsion droplet. Only one of such reads was used for the identification of nucleotide polymorphisms.

For all reads considered as mapped to chromosomes we generated sff files. A total of 30 sff files were generated for each bull. These files were used to generate the chromosome-specific multi-sequence FASTA and FASTA quality files for each animal using PyroBayes v. 0.9 software (1). We used a feature of PyroBayes that permitted adding an extension to each sequence name to distinguish reads originating from the two animals. After adding this extension, the FASTA and FASTA quality files that contained sequences mapped to the same cattle chromosome were merged generating a single set of 30 FASTA and 30 FASTA quality files. We used MosaikBuild v. 0.9 to generate the reference database files from individual cattle chromosome FASTA files (Btau4.0) and merged bull sequence read files. A hash size of 15 (-hs 15) recommended for usage with Titanium 454 reads was used to generate reference chromosome database files. Each reference chromosome file was aligned with the corresponding read database file using MosaikAligner with the following criteria (-hs 15, -mmp 0.05, -act 40, -mhp 100), which allowed the alignment of reads to contain  $\leq 5\%$  mismatches with the reference sequence and an initial alignment seed of 40 bp. For alignments with multiple position seeds, 100 random positions were used to build the alignments. Resulting alignment files were parsed by the MosaikSort and MosaikAssembler programs to generate a multi-sequence reference-based combined assembly of Mark and Chief chromosomes. Only the reads with unique chromosomal assignments from the MosaikAligner output were considered for the SNP detection.

A total of 1,473,596 reads had no matches in Btau4.0 when aligned by Newbler or BLAT (Table S2). Of these, we removed 474,164 reads with highly repetitive sequences and assembled the remaining 992,432 reads into 48,702 contigs with N50 of 913 bp using the “*de novo, accurate*” options of the MIRA3.0 next-generation sequence assembler (2).

All 25,365 contigs  $\geq 500$  bp were remapped against Btau4.0. None of these contigs could be mapped to the Btau4.0 chromosome assemblies; however, nine contigs  $< 800$  bp mapped to Btau4.0 unassigned contigs with  $> 90\%$  sequence identity and over 90% of the contig length covered in the alignment. To investigate if unmapped contigs mostly represent sequences omitted from the Btau4.0 assembly but still present in the sequenced reference genome we then aligned all contigs  $\geq 500$  bp long to the University of Maryland cattle genome assembly UMD 3.0 (3); 20,383 (80.3%) of the contigs containing reads originally unassigned in Btau4.0 were successfully mapped to this assembly. Because Btau 4.0 and UMD3.0 assemblies were built from the same set of raw sequence reads, the majority of our unmapped contigs represent sequences lost in the generation of Btau4.0.

### **Allele calling and SNP filtering**

To identify putative SNP loci that are homozygous in one or both bulls, but with an allele different from the reference genome sequence, we parsed the initial gigaBayes output using the following criteria: 3x minimum read coverage for a new allele with at least 2 reads aligned in opposite orientation (forward, reverse), minimum allele sequence quality  $\geq 20$ , and the polymorphism could not be located within homopolymeric regions ( $\geq 5$  tandem uninterrupted repeats of the same nucleotide) within the reference sequence or assembled reads.

To identify putative SNPs that have two alleles in the sequence reads originating from at least one sequenced animal, the initial gigaBayes file was parsed to exclude polymorphisms in homopolymeric regions ( $\geq 5$  bp tandem single base repeats), regions containing reads aligned only in one orientation for the allele that differs from the reference genome sequence, reads with sequence quality  $< 20$  at a SNP position, and with the minor allele coverage ratio to the total coverage at the SNP position  $\leq 0.2$ . We eliminated SNPs that had coverage higher than 98% of all SNPs in each bull ( $\geq 31x$  coverage in Mark and  $\geq 20x$  coverage in Chief) because these SNPs are likely to be located in duplicated chromosomal regions and be the results of misalignment. The rest of the *in silico* SNPs were considered as heterozygous in at least one individual if two alleles were present at the same position in the reads of Mark, Chief or both bulls. Additional filtering criteria were applied to the last set to identify *in silico* SNPs with each allele covered by at least three sequence reads in Mark and by at least two reads in Chief.

**Linear model for allele frequency difference in Chief descendants and non-descendants.**

The following model was fitted individually for all loci that were not homozygous in Chief (N= 35,036):  $y_{ij} = \mu + desc_i + ch_j + desc_i \times ch_j$ , where  $y_{ij}$  was a variable coded 0, 1, or 2 for each individual  $i$  indicating how many copies of Chief chromosome  $j$  were tracked yielding two records per individual (one per Chief chromosome),  $desc_i$  was coded 1 for descendants and 2 for non-descendants, and  $ch_j$  was 1 and 2 for chromosome 1 or 2. Significance of the interaction term  $desc_i \times ch_j$  indicates a locus where one of the alleles identical to Chief was at significantly different frequency to its complement in his descendants but this was not the case in non-descendants, or vice versa. Such loci are likely to have experienced selective pressure (Figure S7, Table S8).

**Table S1.** Mapping statistics.

| Statistics            | Mark | Chief |
|-----------------------|------|-------|
| Mapped by Newbler     |      |       |
| reads (M)             | 57.9 | 31.8  |
| base pairs (Gbp)      | 20.8 | 11.0  |
| Mapped by BLAT        |      |       |
| reads (M)             | 17.2 | 10.0  |
| base pairs (Gbp)      | 7.2  | 4.1   |
| Mapped to chromosomes |      |       |
| reads (M)             | 71.4 | 37.7  |
| base pairs (Gbp)      | 26.6 | 13.7  |

**Table S2.** *De novo* assembly and mapping of reads with no Newbler or BLAT hits against Btau4.0

| Statistic                        | No.             |
|----------------------------------|-----------------|
| No-hit reads from Mark           | 906,545         |
| No-hit reads from Chief          | 567,051         |
| Total no-hit reads               | 1,473,596       |
| Assembled reads (MIRA 3.0)*      | 992,432         |
| No. singlets                     | 382             |
| No. contigs ( $\geq 2$ reads)    | 48,702          |
| combined length                  | 32.1 Mbp        |
| N50                              | 913 bp          |
| No. contigs $\geq 500$ bp        | 25,365 (100.0%) |
| combined length                  | 22.9 Mbp        |
| No. contigs mapped to Btau 4.0** | 9 (0.04%)       |
| No. contigs mapped to UMD3.0**   | 20,383 (80.3%)  |

\*Non-repetitive reads that could be used for *de novo* assembly

\*\*Mapping criteria by BLAT were  $>90\%$  identity and  $>90\%$  of a contig length covered in the alignment

**Table S3.** SNP detection and filtering statistics

| Filter                                    | “Homozygous” in Mark and Chief reads | “Heterozygous” in Mark and Chief reads (autosomal) |
|-------------------------------------------|--------------------------------------|----------------------------------------------------|
| Initial SNP set                           | 1,851,126 (100.0%)                   | 10,583,734 (100.0%)                                |
| Homopolymer regions ( $\geq 5$ bp)        | 1,672,815 (90.4%)                    | 6,992,325 (66.1%)                                  |
| SNPs with reads in a single direction     | 1,247,978 (67.4%)                    | 2,787,407 (26.3%)                                  |
| 3x minimum allele coverage*               | 1,207,103 (65.2%)                    | NA                                                 |
| 3x coverage per allele, Mark              | NA**                                 | 1,311,454 (12.4%)                                  |
| 2x coverage per allele, Chief             | NA                                   | 818,065 (7.7%)                                     |
| Upper coverage threshold                  |                                      |                                                    |
| 30x coverage Mark                         | NA                                   | 1,286,004 (12.2%)                                  |
| 21x coverage Chief                        | NA                                   | 802,559 (7.6%)                                     |
| Allele-to-coverage ratio threshold (>0.2) |                                      |                                                    |
| Mark                                      | NA                                   | 1,243,113 (11.7%)                                  |
| Chief                                     | NA                                   | 757,266 (7.2%)                                     |
| Heterozygous in at least one bull         | NA                                   | 1,356,094 (12.8%)                                  |
| Heterozygous in both bulls                | NA                                   | 265,707 (2.5%)                                     |
| Homozygous for a different allele         | NA                                   | 117,908 (1.1%)                                     |
| Haplotype phase reconstructed***          | NA                                   | 972,479 (9.2%)                                     |

\*Positions and alleles of filtered homozygous SNPs are available from:

<http://www.bioinformaticsonline.com/sample.html>

\*\*NA; not applicable.

\*\*\*Complete phasing of all Chief and Mark alleles is available from:

<http://www.bioinformaticsonline.com/sample.html>



**Table S4.** Comparison between genotyped and sequence-based SNPs

| Set                                                                            | Mark            | Chief           |
|--------------------------------------------------------------------------------|-----------------|-----------------|
| SNP50 SNPs genotyped                                                           | 54,001 (100.0%) | 54,001 (100.0%) |
| Mapped to Btau4.0<br>chromosomes                                               | 52,329 (96.9%)  | 52,329 (96.9%)  |
| Successful genotypes                                                           | 52,138          | 52,155          |
| Corrected genotypes*                                                           | 44 (0.1%)       | NA              |
| Reconstructed genotypes                                                        | 109 (0.2%)      | NA              |
| No. autosomal heterozygous<br>SNP50 SNPs in the unfiltered<br>sequence SNP set | 15,826          | 15,448          |
| No. SNP50 heterozygous<br>SNPs in the sequence set                             | 14,747 (93.2%)  | 13,407 (86.8%)  |
| No. heterozygous SNPs in<br>filtered sequence set                              | 14,033 (95.2%)  | 10,219 (76.2%)  |
| No. overlapping SNP50<br>heterozygous SNPs                                     | 1,243,113       | 757,266         |
| Reported as homozygous<br>in the sequence set                                  | 8,009 (50.6%)   | 5,459 (35.3%)   |
| No. homozygous SNP50 SNPs                                                      | 4,182           | 4,182           |
| No. reported as<br>heterozygous in the<br>sequence set                         | 3,462           | 4,182           |
| Total no. of overlaps between<br>sequence and SNP50                            | 11,471          | 9,641           |
| Total no. of inconsistent<br>genotypes                                         | 198 (1.7%)      | 840 (8.7%)      |
| Total no. of consistent<br>genotypes                                           | 11,273 (98.3%)  | 8,801 (91.3%)   |

\*These Mark genotypes contradicted segregation of the same SNPs in his genotyped offspring and were corrected to match offspring genotypes

**Table S5.** Agreement in allele phasing for haplotypes defined by 454 Sequencing and SNP50 genotyping

| Min. total coverage | No. SNPs. | No. SNP50 SNPs | Agreement (%) |
|---------------------|-----------|----------------|---------------|
| 3x Mark, 2x Chief   | 972,479   | 6,109          | 92.6          |
| 3x Mark, 3x Chief   | 879,926   | 5,556          | 93.7          |
| 6x Mark, 6x Chief   | 512,545   | 3,378          | 96.7          |
| 7x Mark, 7x Chief   | 386,829   | 2,625          | 97.3          |

**Table S6. Statistics on the length of tracked segments in descendents of Chief**

All statistics in number of loci, except where indicated, convert to megabases by multiplying by mean interval of 0.0768 mb (i.e., 3000mb / 39047SNP = 0.0768)

| All segments |       |        |                         |                   |                  | Only segments longer than 30 loci included |       |        |                         |                    |                  |
|--------------|-------|--------|-------------------------|-------------------|------------------|--------------------------------------------|-------|--------|-------------------------|--------------------|------------------|
| chr          | min   | max    | mean length of segments | mean length in Mb | Stand. Deviation | chr                                        | min   | max    | mean length of segments | mean length in Mb. | Stand. Deviation |
| 1            | 5     | 1146   | 155.65                  | 11.95             | 148.17           | 1                                          | 33    | 1146   | 156.25                  | 12.00              | 148.19           |
| 2            | 2     | 1727   | 139.30                  | 10.70             | 141.18           | 2                                          | 31    | 1727   | 145.68                  | 11.19              | 141.61           |
| 3            | 38    | 1589   | 180.65                  | 13.87             | 166.62           | 3                                          | 38    | 1589   | 180.65                  | 13.87              | 166.62           |
| 4            | 41    | 1033   | 177.25                  | 13.61             | 133.89           | 4                                          | 41    | 1033   | 177.25                  | 13.61              | 133.89           |
| 5            | 8     | 552    | 108.16                  | 8.31              | 79.74            | 5                                          | 31    | 552    | 114.69                  | 8.81               | 78.24            |
| 6            | 4     | 1396   | 161.33                  | 12.39             | 139.97           | 6                                          | 32    | 1396   | 161.98                  | 12.44              | 139.92           |
| 7            | 17    | 1162   | 132.51                  | 10.18             | 119.25           | 7                                          | 31    | 1162   | 132.99                  | 10.21              | 119.28           |
| 8            | 3     | 1641   | 185.88                  | 14.28             | 195.38           | 8                                          | 31    | 1641   | 186.51                  | 14.32              | 195.46           |
| 9            | 42    | 1494   | 258.12                  | 19.82             | 251.61           | 9                                          | 42    | 1494   | 258.12                  | 19.82              | 251.61           |
| 10           | 2     | 765    | 146.30                  | 11.24             | 108.19           | 10                                         | 41    | 765    | 146.44                  | 11.25              | 108.14           |
| 11           | 4     | 1184   | 139.44                  | 10.71             | 127.31           | 11                                         | 32    | 1184   | 149.51                  | 11.48              | 127.30           |
| 12           | 27    | 1037   | 154.15                  | 11.84             | 134.26           | 12                                         | 38    | 1037   | 154.26                  | 11.85              | 134.26           |
| 13           | 42    | 555    | 124.36                  | 9.55              | 91.97            | 13                                         | 42    | 555    | 124.36                  | 9.55               | 91.97            |
| 14           | 2     | 1318   | 188.42                  | 14.47             | 199.51           | 14                                         | 31    | 1318   | 191.77                  | 14.73              | 199.98           |
| 15           | 42    | 1002   | 193.07                  | 14.83             | 163.12           | 15                                         | 42    | 1002   | 193.07                  | 14.83              | 163.12           |
| 16           | 42    | 499    | 112.08                  | 8.61              | 72.95            | 16                                         | 42    | 499    | 112.08                  | 8.61               | 72.95            |
| 17           | 2     | 1113   | 141.52                  | 10.87             | 125.10           | 17                                         | 31    | 1113   | 148.11                  | 11.37              | 125.24           |
| 18           | 41    | 662    | 126.73                  | 9.73              | 97.96            | 18                                         | 41    | 662    | 126.73                  | 9.73               | 97.96            |
| 19           | 4     | 1066   | 155.29                  | 11.93             | 151.30           | 19                                         | 37    | 1066   | 155.44                  | 11.94              | 151.30           |
| 20           | 42    | 1063   | 198.38                  | 15.24             | 163.28           | 20                                         | 42    | 1063   | 198.38                  | 15.24              | 163.28           |
| 21           | 9     | 1029   | 159.76                  | 12.27             | 141.25           | 21                                         | 34    | 1029   | 161.30                  | 12.39              | 141.22           |
| 22           | 38    | 526    | 110.63                  | 8.50              | 76.33            | 22                                         | 38    | 526    | 110.63                  | 8.50               | 76.33            |
| 23           | 17    | 762    | 150.83                  | 11.58             | 122.29           | 23                                         | 32    | 762    | 151.01                  | 11.60              | 122.28           |
| 24           | 5     | 807    | 129.23                  | 9.93              | 101.82           | 24                                         | 34    | 807    | 131.15                  | 10.07              | 101.49           |
| 25           | 42    | 762    | 142.10                  | 10.91             | 119.87           | 25                                         | 42    | 762    | 142.10                  | 10.91              | 119.87           |
| 26           | 8     | 799    | 160.18                  | 12.30             | 111.62           | 26                                         | 34    | 799    | 160.77                  | 12.35              | 111.46           |
| 27           | 42    | 608    | 128.50                  | 9.87              | 104.82           | 27                                         | 42    | 608    | 128.50                  | 9.87               | 104.82           |
| 28           | 42    | 720    | 201.26                  | 15.46             | 146.56           | 28                                         | 42    | 720    | 201.26                  | 15.46              | 146.56           |
| 29           | 42    | 798    | 199.01                  | 15.28             | 144.52           | 29                                         | 42    | 798    | 199.01                  | 15.28              | 144.52           |
| mean         | 22.59 | 993.62 | 157.24                  | 12.08             | 133.79           | mean                                       | 36.86 | 993.62 | 158.62                  | 12.18              | 133.75           |

**Table S7. Genes with SNPs in 49 selected regions**

| Region No. | chr | start     | end       | haplotype  | No. intron SNPs | No. exon SNPs | No. 3'UTR SNPs | No. 5'UTR SNPs | No. down stream SNPs | No. up stream SNPs | No. ncRNA SNPs | No. Updown stream SNPs | Total gene related SNPs | Gene/Non-syn. SNP                                                                                                                                                                                                                                                                                                         | No. Nonsyn SNPs | Gene/UTR5' SNPs                                                                                                                                                          | No. UTR5' SNPs | Gene/UTR3' SNPs                                                                                                                                                                 | No. UTR3' SNPs | Highest significance value (SNP50) | Bp. of the SNP with the highest significance | Gene, closest to the highest significance SNP | Distance between the gene and the highest significance SNP |
|------------|-----|-----------|-----------|------------|-----------------|---------------|----------------|----------------|----------------------|--------------------|----------------|------------------------|-------------------------|---------------------------------------------------------------------------------------------------------------------------------------------------------------------------------------------------------------------------------------------------------------------------------------------------------------------------|-----------------|--------------------------------------------------------------------------------------------------------------------------------------------------------------------------|----------------|---------------------------------------------------------------------------------------------------------------------------------------------------------------------------------|----------------|------------------------------------|----------------------------------------------|-----------------------------------------------|------------------------------------------------------------|
| 9          | 1   | 28926715  | 30828461  | CH1        | 85              | 0             | 0              | 0              | 1                    | 2                  | 0              | 0                      | 88                      |                                                                                                                                                                                                                                                                                                                           | 0               |                                                                                                                                                                          | 0              |                                                                                                                                                                                 | 0              | 0.2689295                          | 30036544                                     | GBE1                                          | 394822                                                     |
| 1          | 1   | 30843174  | 33095595  | homozygous | 0               | 0             | 0              | 0              | 0                    | 0                  | 0              | 0                      | 0                       |                                                                                                                                                                                                                                                                                                                           | 0               |                                                                                                                                                                          | 0              |                                                                                                                                                                                 | 0              | 0.4316797                          | 32582468                                     | VGLL3                                         | 2847864                                                    |
| 26         | 1   | 33136013  | 33849425  | CH2        | 0               | 0             | 0              | 0              | 0                    | 0                  | 0              | 0                      | 0                       |                                                                                                                                                                                                                                                                                                                           | 0               |                                                                                                                                                                          | 0              |                                                                                                                                                                                 | 0              | 0.3150566                          | 33136013                                     | VGLL3                                         | 2294319                                                    |
| 27         | 1   | 78441352  | 80938504  | CH2        | 258             | 8             | 0              | 0              | 1                    | 1                  | 0              | 0                      | 268                     | LPP-NM_001192591:exon7:c.G910A:p.A304T                                                                                                                                                                                                                                                                                    | 1               |                                                                                                                                                                          | 0              |                                                                                                                                                                                 | 0              | 0.3720627                          | 80938504                                     | LPP                                           | 30140                                                      |
| 2          | 1   | 80963023  | 86748745  | homozygous | 9               | 0             | 2              | 0              | 0                    | 0                  | 0              | 0                      | 11                      |                                                                                                                                                                                                                                                                                                                           | 0               |                                                                                                                                                                          | 0              | EIF4A2,EIF4A2,                                                                                                                                                                  | 2              | 0.3855527                          | 81062374                                     | LPP                                           | 154010                                                     |
| 28         | 1   | 87774881  | 89771788  | CH2        | 108             | 0             | 0              | 1              | 0                    | 3                  | 0              | 0                      | 112                     |                                                                                                                                                                                                                                                                                                                           | 0               | PEXSL                                                                                                                                                                    | 1              |                                                                                                                                                                                 | 0              | 0.2615318                          | 87774881                                     | DNAJC19                                       | 318905                                                     |
| 29         | 1   | 90839076  | 91721438  | CH2        | 0               | 0             | 0              | 0              | 0                    | 0                  | 0              | 0                      | 0                       |                                                                                                                                                                                                                                                                                                                           | 0               |                                                                                                                                                                          | 0              |                                                                                                                                                                                 | 0              | 0.2506527                          | 91187325                                     | KCNMB2                                        | 384720                                                     |
| 10         | 1   | 116539265 | 119740643 | CH1        | 113             | 2             | 1              | 1              | 0                    | 1                  | 0              | 0                      | 118                     | CLRN1-NM_001192101:exon2:c.C317T:p.T106I                                                                                                                                                                                                                                                                                  | 1               | GPR171                                                                                                                                                                   | 1              | P2RY13,                                                                                                                                                                         | 1              | 0.2737163                          | 118270530                                    | P2RY12                                        | 3291                                                       |
| 11         | 2   | 372648    | 4771836   | CH1        | 15              | 2             | 5              | 0              | 1                    | 0                  | 0              | 0                      | 23                      |                                                                                                                                                                                                                                                                                                                           | 0               |                                                                                                                                                                          | 0              | IMP1,POLR2D,<br>POLR2D,POLR2D,<br>POLR2D,                                                                                                                                       | 5              | 0.2506527                          | 3750890                                      | HS6ST1                                        | 443108                                                     |
| 12         | 2   | 19963404  | 25213239  | CH1        | 415             | 6             | 6              | 2              | 1                    | 10                 | 0              | 0                      | 440                     | CHRNA1-NM_176664:exon2:c.G52A:p.V18I,<br>SCRN3-NM_001075547:exon5:c.C578T:p.T193M,<br>ITGA6-NM_001109981:exon7:c.A1094G:p.K368R                                                                                                                                                                                           | 3               | KIAA1715,CHN1                                                                                                                                                            | 2              | CHRNA1,WIPF1,<br>CDC47,CDC47,<br>CDC47,RAPGEF4                                                                                                                                  | 6              | 0.2615318                          | 24418478                                     | RAPGEF4                                       | 41418                                                      |
| 30         | 2   | 131746089 | 131746089 | CH2        | 0               | 0             | 0              | 0              | 0                    | 0                  | 0              | 0                      | 0                       |                                                                                                                                                                                                                                                                                                                           | 0               |                                                                                                                                                                          | 0              |                                                                                                                                                                                 | 0              | 0.2428198                          | 131746089                                    | LDLRAP1                                       | 25260                                                      |
| 3          | 2   | 132134957 | 136766494 | homozygous | 9               | 4             | 0              | 0              | 0                    | 0                  | 0              | 0                      | 13                      | TCEB3-NM_001102333:exon4:c.G624T:p.Q208H,<br>TCEB3-NM_001102333:exon4:c.G490A:p.V164I                                                                                                                                                                                                                                     | 2               |                                                                                                                                                                          | 0              |                                                                                                                                                                                 | 0              | 0.3798956                          | 136680530                                    | CAMK2N1                                       | 64799                                                      |
| 31         | 2   | 136888949 | 136888949 | CH2        | 0               | 0             | 0              | 0              | 0                    | 0                  | 0              | 0                      | 0                       |                                                                                                                                                                                                                                                                                                                           | 0               |                                                                                                                                                                          | 0              |                                                                                                                                                                                 | 0              | 0.3659704                          | 136888949                                    | PLA2G2F                                       | 147900                                                     |
| 13         | 2   | 136946254 | 138931566 | CH1        | 177             | 5             | 12             | 9              | 11                   | 38                 | 0              | 0                      | 252                     | PLA2G2F-NM_001102522:exon1:c.G32T:p.G11V,<br>POLC2-NM_001080269:exon6:c.A592G:p.R199G,<br>ALDH4A1-NM_001105646:exon6:c.A532G:p.M178V,<br>AKR7A2-NM_001101949:exon2:c.C211T:p.Q71X                                                                                                                                         | 4               | PLA2G2F,PLA2G2F,<br>PLA2G5,PLA2G5,<br>"LOC100125947,PLA2G2A",<br>"LOC100125947,PLA2G2A",<br>"LOC100125947,PLA2G2A",<br>"LOC100125947,PLA2G2A",<br>"LOC100125947,PLA2G2A" | 9              | PLA2G2F,PLA2G2F,<br>PLA2G2F,PLA2G2F,<br>PLA2G2F,<br>PLA2G2F,PLA2G2F,<br>"PLA2G2D1,PLA2G2D3",<br>"PLA2G2D1,PLA2G2D3",<br>"PLA2G2D1,PLA2G2D3",<br>"PLA2G2D1,PLA2G2D3",<br>ALDH4A1 | 12             | 0.3803307                          | 137256833                                    | PLA2G2A                                       | 2457                                                       |
| 32         | 4   | 19053103  | 22499221  | CH2        | 22              | 2             | 0              | 2              | 0                    | 0                  | 0              | 0                      | 26                      |                                                                                                                                                                                                                                                                                                                           | 0               | ARL4A,ARL4A                                                                                                                                                              | 2              |                                                                                                                                                                                 | 0              | 0.2449956                          | 22272736                                     | ARL4A                                         | 697878                                                     |
| 33         | 4   | 49699919  | 60292651  | CH2        | 738             | 12            | 7              | 0              | 5                    | 6                  | 0              | 0                      | 768                     | HBP1-NM_001046196:exon7:c.G761A:p.G254D,<br>SLC26A3-NM_001083676:exon5:c.G466A:p.A156T,<br>CFTR-NM_174018:exon11:c.A1402T:p.M468L,<br>CFTR-NM_174018:exon9:c.G1185T:p.E395D,                                                                                                                                              | 4               |                                                                                                                                                                          | 0              |                                                                                                                                                                                 | 7              | 0.3742385                          | 53778230                                     | MET                                           | 14946                                                      |
| 14         | 4   | 100634712 | 102378316 | CH1        | 269             | 6             | 0              | 0              | 8                    | 2                  | 0              | 0                      | 285                     | LRGUR-NM_001192887:exon1:c.A591T:p.K20M,<br>CALD1-NM_174258:exon4:c.C735G:p.F245L                                                                                                                                                                                                                                         | 2               |                                                                                                                                                                          | 0              |                                                                                                                                                                                 | 0              | 0.2393386                          | 101912397                                    | AKR1B10                                       | 36605                                                      |
| 34         | 5   | 79195620  | 85534666  | CH2        | 337             | 20            | 11             | 1              | 19                   | 5                  | 0              | 0                      | 393                     | NCF4-NM_001045983:exon10:c.G841C:p.E281Q,<br>CSF2RB-NM_001192664:exon2:c.T41C:p.V14A,<br>CSF2RB-NM_001192664:exon6:c.G595A:p.D199N,<br>MPST-NM_001034291:exon2:c.C139T:p.R47C,<br>MPST-NM_001034291:exon2:c.G385A:p.D129N,<br>DNM1L-NM_001046494:exon7:c.T560C:p.V187A,<br>LOC510651-NM_001101072:exon5:c.T4862A:p.L1621Q | 7               | MGC133880                                                                                                                                                                | 1              | RASD2,RASD2,<br>RASD2,RASD2,<br>LOC510193,LOC510193,<br>LOC510193,TXN2,<br>EIF3D,AMN1,<br>AMN1                                                                                  | 11             | 0.2526285                          | 82792167                                     | PKP2                                          | 95708                                                      |

|    |   |           |           |            |     |    |    |   |    |    |   |   |     |                                                                                                                                                                                                                                                                                                                                                                                                                                                                                                                                                                                                                                                                                                                                                                                                                                                                                                                                                                                                                                                                             |    |                                        |   |                                                                                                                                                                                                           |    |           |           |           |        |
|----|---|-----------|-----------|------------|-----|----|----|---|----|----|---|---|-----|-----------------------------------------------------------------------------------------------------------------------------------------------------------------------------------------------------------------------------------------------------------------------------------------------------------------------------------------------------------------------------------------------------------------------------------------------------------------------------------------------------------------------------------------------------------------------------------------------------------------------------------------------------------------------------------------------------------------------------------------------------------------------------------------------------------------------------------------------------------------------------------------------------------------------------------------------------------------------------------------------------------------------------------------------------------------------------|----|----------------------------------------|---|-----------------------------------------------------------------------------------------------------------------------------------------------------------------------------------------------------------|----|-----------|-----------|-----------|--------|
| 35 | 5 | 102991052 | 111840712 | CH2        | 532 | 38 | 25 | 5 | 37 | 40 | 0 | 0 | 677 | GPRC5A-NM_001034515:exon2:c.A268G;p.N90D,<br>GPRC5A-NM_001034515:exon2:c.A256G;p.186V,<br>STYK1-NM_001143868:exon7:c.C856T;p.R286C,<br>KLRA1-NM_174376:exon4:c.T250C;p.W84R,<br>KLRA1-NM_174376:exon5:c.C503A;p.A168D,<br>KLRA1-NM_174376:exon5:c.T536C;p.I179T,<br>KLRA1-NM_174376:exon5:c.A550G;p.N184D,<br>KLRA1-NM_174376:exon5:c.G557C;p.C186S,<br>KLRA1-NM_174376:exon7:c.C697A;p.H233N,<br>KLRA1-NM_174376:exon7:c.A783C;p.K261N,<br>KLRJ1-NM_001002884:exon8:c.A707G;p.H236R,<br>NKG2C-NM_001098163:exon1:c.C147p.T5M,<br>NKG2C-NM_001098163:exon1:c.A32C;p.Q11P,<br>NKG2C-NM_001098163:exon2:c.A86G;p.Q29R,<br>NKG2C-NM_001098163:exon2:c.C134T;p.T45M,<br>CLEC7A-NM_001031852:exon5:c.A589G;p.S197G,<br>A2M-NM_001109795:exon8:c.G877C;p.E230Q,<br>A2M-NM_001109795:exon14:c.A1678G;p.I560V,<br>A2M-NM_001109795:exon14:c.C1694A;p.A565D,<br>A2ML1-NM_001191301:exon1:c.C137p.L5F,<br>MFAP5-NM_174386:exon2:c.G4A;p.A2T,<br>AICDA-NM_001038682:exon2:c.C182T;p.S61F,<br>WC1.3-NM_001190404:exon12:c.A2793C;p.R931S,<br>WC1.3-NM_001190424:exon20:c.G421T;p.G1404V | 24 | KLRA1,KLRA1,<br>KLRA1,KLRA1,<br>SCNN1A | 5 | HEBP1,HEBP1,<br>HEBP1,GPRC5A,<br>DDX47,DDX47,<br>DDX47,APOLD1,<br>APOLD1,STYK1,<br>STYK1,STYK1,<br>STYK1,<br>MAGOHB,MAGOHB,<br>MAGOHB,KLRA1,<br>KLRA1,LOC618567,<br>LOC618567,LOC618567,<br>MRPL51,TAPBP1 | 25 | 0.4046997 | 105666728 | TAS2R42   | 198542 |
| 36 | 5 | 112912610 | 115310536 | CH2        | 118 | 2  | 2  | 0 | 2  | 0  | 0 | 1 | 125 | TULP3-NM_001089992:exon4:c.G421A;p.A141I,<br>C5H1Zorf32-NM_001079631:exon2:c.T95C;p.F32S                                                                                                                                                                                                                                                                                                                                                                                                                                                                                                                                                                                                                                                                                                                                                                                                                                                                                                                                                                                    | 2  |                                        | 0 | TULP3,C5H1Zorf32                                                                                                                                                                                          | 2  | 0.2663185 | 114197492 | CCDC77    | 4002   |
| 37 | 6 | 14655455  | 16338862  | CH2        | 5   | 0  | 0  | 0 | 0  | 0  | 0 | 0 | 5   |                                                                                                                                                                                                                                                                                                                                                                                                                                                                                                                                                                                                                                                                                                                                                                                                                                                                                                                                                                                                                                                                             | 0  |                                        | 0 |                                                                                                                                                                                                           | 0  | 0.2402089 | 16145595  | PITX2     | 108439 |
| 15 | 6 | 62196908  | 70336281  | CH1        | 584 | 9  | 2  | 0 | 0  | 4  | 0 | 1 | 600 | APBB2-NM_001076847:exon4:c.A541C;p.N181H,<br>GABRG1-NM_001101250:exon1:c.T48G;p.N18K,<br>CNGA1-NM_174278:exon8:c.C1682T;p.S561F                                                                                                                                                                                                                                                                                                                                                                                                                                                                                                                                                                                                                                                                                                                                                                                                                                                                                                                                             | 3  |                                        | 0 | GABRG1,GABRG1                                                                                                                                                                                             | 2  | 0.2989556 | 64023711  | ATP8A1    | 38810  |
| 4  | 6 | 70403628  | 71660659  | homozygous | 3   | 0  | 0  | 0 | 0  | 0  | 0 | 0 | 3   |                                                                                                                                                                                                                                                                                                                                                                                                                                                                                                                                                                                                                                                                                                                                                                                                                                                                                                                                                                                                                                                                             | 0  |                                        | 0 |                                                                                                                                                                                                           | 0  | 0.3642298 | 71562444  | SCFD2     | 3772   |
| 16 | 6 | 71909864  | 90075263  | CH1        | 601 | 14 | 11 | 0 | 16 | 14 | 0 | 0 | 656 | UGT2B10-NM_001046354:exon5:c.G1229A;p.G410E,<br>SULT1B1-NM_001075823:exon6:c.G629A;p.R210Q,<br>ODAMN1-NM_001080315:exon4:c.T160A;p.F54I,<br>ODAMN1-NM_001080315:exon6:c.A520G;p.K174E,<br>AMBN-NM_173988:exon7:c.T526C;p.S176P                                                                                                                                                                                                                                                                                                                                                                                                                                                                                                                                                                                                                                                                                                                                                                                                                                              | 5  |                                        | 0 | SRP72,SRP72,<br>SPINK2,SPINK2,<br>TECL2,STAP1,<br>SULT1E1,<br>SULT1E1,SULT1E1,<br>SULT1E1,HSTN                                                                                                            | 11 | 0.3629243 | 84174079  | TECL2     | 922259 |
| 38 | 6 | 92124510  | 97644103  | CH2        | 395 | 9  | 19 | 0 | 11 | 9  | 0 | 0 | 443 | SCARB2-NM_001102153:exon6:c.G785A;p.R262K                                                                                                                                                                                                                                                                                                                                                                                                                                                                                                                                                                                                                                                                                                                                                                                                                                                                                                                                                                                                                                   | 1  |                                        | 0 | RCHY1,RCHY1,<br>THAP6,THAP6,<br>CXCL10,CXCL10,<br>SCARB2,<br>SCARB2,SCARB2,<br>SCARB2,SCARB2,<br>SCARB2,CXCL13,<br>CNOT6L,CNOT6L,<br>CNOT6L,MRPL1                                                         | 19 | 0.2650131 | 94601620  | SCARB2    | 260299 |
| 39 | 7 | 37078577  | 43183117  | CH2        | 194 | 14 | 5  | 1 | 11 | 19 | 0 | 0 | 244 | CDHR2-NM_001192304:exon2:c.C82T;p.P28S,<br>CDHR2-NM_001192304:exon7:c.G538A;p.V180I,<br>CDHR2-NM_001192304:exon7:c.A584G;p.N196S,<br>CDHR2-NM_001192304:exon18:c.A263G;p.N879S,<br>CDHR2-NM_001192304:exon29:c.C3733T;p.H1245Y,<br>TRIM52-NM_001078024:exon1:c.A776T;p.D259V,<br>MADCAM1-NM_001037821:exon3:c.A638G;p.H213R,<br>MBD3-NM_001128505:exon5:c.T686C;p.V229A                                                                                                                                                                                                                                                                                                                                                                                                                                                                                                                                                                                                                                                                                                     | 8  | RMND5B                                 | 1 | TRIM52,TRIM52,<br>SH3BP5L,MBD3,<br>MBD3                                                                                                                                                                   | 5  | 0.259356  | 41428235  | MGC137030 | 426299 |
| 17 | 7 | 40641856  | 43162929  | CH1        | 52  | 3  | 3  | 0 | 4  | 2  | 0 | 0 | 64  | MADCAM1-NM_001037821:exon3:c.A638G;p.H213R,<br>MBD3-NM_001128505:exon5:c.T686C;p.V229A                                                                                                                                                                                                                                                                                                                                                                                                                                                                                                                                                                                                                                                                                                                                                                                                                                                                                                                                                                                      | 2  |                                        | 0 | SH3BP5L,MBD3,MBD3                                                                                                                                                                                         | 3  | 0.3520453 | 42816139  | MUM1      | 4428   |
| 40 | 7 | 44804506  | 45590074  | CH2        | 38  | 1  | 6  | 1 | 3  | 3  | 0 | 0 | 52  |                                                                                                                                                                                                                                                                                                                                                                                                                                                                                                                                                                                                                                                                                                                                                                                                                                                                                                                                                                                                                                                                             | 0  | C7H5orf24                              | 1 | C7H5ORF15,C7H5ORF15,<br>VDAC1,VDAC1,<br>SKP1,SAR1B                                                                                                                                                        | 6  | 0.2328111 | 45321189  | SAR1B     | 26     |

|    |    |          |           |            |      |    |    |   |    |    |   |   |      |                                                                                                                                                                                                                                                                                                                                                                                                                                                                                                                                                                                                                                                                                                                                                                                                                                                                                                                                                                                                                                                                                                                                                                                                                                                                                                                                                                          |    |               |           |                                                                                                                                                                      |       |           |          |        |        |
|----|----|----------|-----------|------------|------|----|----|---|----|----|---|---|------|--------------------------------------------------------------------------------------------------------------------------------------------------------------------------------------------------------------------------------------------------------------------------------------------------------------------------------------------------------------------------------------------------------------------------------------------------------------------------------------------------------------------------------------------------------------------------------------------------------------------------------------------------------------------------------------------------------------------------------------------------------------------------------------------------------------------------------------------------------------------------------------------------------------------------------------------------------------------------------------------------------------------------------------------------------------------------------------------------------------------------------------------------------------------------------------------------------------------------------------------------------------------------------------------------------------------------------------------------------------------------|----|---------------|-----------|----------------------------------------------------------------------------------------------------------------------------------------------------------------------|-------|-----------|----------|--------|--------|
| 41 | 9  | 39369494 | 85474842  | CH2        | 2165 | 33 | 23 | 1 | 42 | 30 | 0 | 0 | 2294 | SLC22A16:NM_001076324:exon2:c.C281A:p.A94E,<br>PREP:NM_174772:exon3:c.A235C:p.N79H,<br>LOC782657:NM_001110094:exon1:c.A28T:p.S10C,<br>MAP3K7:NM_001081595:exon10:c.A911G:p.H304R,<br>SLC35A1:NM_001034637:exon2:c.G85A:p.V29I,<br>C9H6orf163:NM_001079772:exon5:c.A614G:p.N205S,<br>NTSE:NM_174129:exon8:c.A1526G:p.G509R,<br>NTSE:NM_174129:exon7:c.T1318C:p.Y440H,<br>L3MBTL3:NM_001076871:exon7:c.T578C:p.V193A,<br>L3MBTL3:NM_001076871:exon17:c.C1569A:p.D523E,<br>ENPP3:NM_001075923:exon3:c.T218C:p.V73A,<br>SLC2A12:NM_001011683:exon2:c.G1355A:p.R452Q,<br>MMAB:NM_001079632:exon2:c.G666C:p.R222S,<br>MMAB:NM_001079632:exon1:c.A359G:p.E119G,<br>MMAB:NM_001079632:exon1:c.T103A:p.F104I                                                                                                                                                                                                                                                                                                                                                                                                                                                                                                                                                                                                                                                                      | 15 | FLAG1         | 1         | DDO,CDC40,<br>FIG4,NTSE,<br>NTSE,NTSE,<br>NTSE,NTSE,<br>NTSE,ARG1,<br>ARG1,ARG1,<br>STX7,VNN2,<br>VNN2,ALDH8A1,<br>PDE7B,PEX7,<br>PERP,PERP,<br>HEBP2,HEBP2,<br>SFB5 | 23    | 0.3546562 | 79013299 | REPS1  | 19940  |
| 42 | 9  | 86683885 | 106717246 | CH2        | 2003 | 21 | 4  | 1 | 20 | 9  | 0 | 0 | 2058 | LATS1:NM_001192866:exon2:c.G142T:p.A48S,<br>RAET1G:NM_205785:exon1:c.G17T:p.R6I,<br>ULBP17:NM_001168613:exon1:c.G17T:p.R6I,<br>RAET1G:NM_205785:exon3:c.A386G:p.H129R,<br>ULBP17:NM_001168613:exon3:c.A386G:p.H129R,<br>RAET1G:NM_205785:exon3:c.C439G:p.Q147E,<br>ULBP17:NM_001168613:exon3:c.C439G:p.Q147E,<br>RAET1G:NM_205785:exon3:c.A440T:p.Q147L,<br>ULBP17:NM_001168613:exon3:c.A440T:p.Q147L,<br>RAET1G:NM_205785:exon3:c.G446T:p.S149I,<br>ULBP17:NM_001168613:exon3:c.G446T:p.S149I,<br>RAET1G:NM_205785:exon3:c.T461C:p.L154S,<br>ULBP17:NM_001168613:exon3:c.T461C:p.L154S,<br>RAET1G:NM_205785:exon3:c.G485A:p.G162D,<br>ULBP17:NM_001168613:exon3:c.G485A:p.G162D,<br>RAET1G:NM_205785:exon3:c.A489C:p.Q163H,<br>ULBP17:NM_001168613:exon3:c.A489C:p.Q163H,<br>RAET1G:NM_205785:exon3:c.T539C:p.M180T,<br>ULBP17:NM_001168613:exon3:c.T539C:p.M180T,<br>RAET1G:NM_205785:exon3:c.G540C:p.M180I,<br>ULBP17:NM_001168613:exon3:c.G540C:p.M180I,<br>RAET1G:NM_205785:exon3:c.G543C:p.E181D,<br>ULBP17:NM_001168613:exon3:c.G543C:p.E181D,<br>RAET1G:NM_205785:exon5:c.G818C:p.C273S,<br>ULBP17:NM_001168613:exon5:c.G818C:p.C273S,<br>RAET1G:NM_205785:exon5:c.G830A:p.C277Y,<br>ULBP17:NM_001168613:exon5:c.G830A:p.C277Y,<br>NOX3:NM_001193333:exon9:c.G932A:p.R311H,<br>WTAP:NM_001113254:exon8:c.G739A:p.A247T,<br>PLG:NM_173951:exon12:c.C1548A:p.P517T | 17 | RAET1G,ULBP17 | 1         | PRPS1,WTAP,<br>IGF2R,IGF2R                                                                                                                                           | 4     | 0.3259356 | 93337723 | VIP    | 27142  |
| 43 | 10 | 49001707 | 61827410  | CH2        | 595  | 10 | 13 | 1 | 13 | 8  | 3 | 0 | 643  | CCNB2:NM_174264:exon3:c.G206A:p.S69N,<br>RFX7:NM_001192820:exon9:c.T1750C:p.S584P,<br>RFX7:NM_001192820:exon9:c.A2475T:p.E825D,<br>MYO5C:NM_001192729:exon35:c.G4327A:p.D1443N,<br>HDC:NM_001024551:exon2:c.G121A:p.A41T,                                                                                                                                                                                                                                                                                                                                                                                                                                                                                                                                                                                                                                                                                                                                                                                                                                                                                                                                                                                                                                                                                                                                                | 5  | CYP19A1       | 1         | ANK2,ANK2,<br>MNS1,RFX7,<br>CYP19A1,CYP19A1,<br>CYP19A1,<br>CYP19A1,CYP19A1,<br>CYP19A1,CYP19A1,<br>CYP19A1,TMOD3                                                    | 13    | 0.3994778 | 52197725 | ADAM10 | 3522   |
| 44 | 10 | 63224427 | 73324516  | CH2        | 264  | 14 | 2  | 0 | 4  | 2  | 1 | 0 | 287  | MYEF2:NM_001102085:exon13:c.C1277G:p.T426S,<br>SPATA5L1:NM_001105625:exon7:c.A2083G:p.S695G,<br>SPATA5L1:NM_001105625:exon7:c.G2050A:p.A644T,<br>C10H14orf37:NM_001038060:exon2:c.G1150T:p.V384F,<br>C10H14orf37:NM_001038060:exon2:c.G1027A:p.E343K,<br>C10H14orf37:NM_001038060:exon2:c.T1022G:p.V341G                                                                                                                                                                                                                                                                                                                                                                                                                                                                                                                                                                                                                                                                                                                                                                                                                                                                                                                                                                                                                                                                 | 6  |               | 0         | SEMA6D,SQRDL                                                                                                                                                         | 2     | 0.3133159 | 68108176 | BMP4   | 114062 |
| 5  | 11 | 19896588 | 20223876  | homozygous | 0    | 0  | 0  | 0 | 0  | 0  | 0 | 0 | 0    |                                                                                                                                                                                                                                                                                                                                                                                                                                                                                                                                                                                                                                                                                                                                                                                                                                                                                                                                                                                                                                                                                                                                                                                                                                                                                                                                                                          |    | 0             | 0.2885117 | 19896588                                                                                                                                                             | FEZ2  | 148275    |          |        |        |
| 18 | 11 | 21982224 | 22626344  | CH1        | 29   | 0  | 0  | 1 | 0  | 1  | 0 | 0 | 31   |                                                                                                                                                                                                                                                                                                                                                                                                                                                                                                                                                                                                                                                                                                                                                                                                                                                                                                                                                                                                                                                                                                                                                                                                                                                                                                                                                                          |    | 0             | 0.272846  | 22565107                                                                                                                                                             | MORN2 | 135767    |          |        |        |

|    |    |          |          |            |     |    |    |   |    |   |   |   |     |                                                                                                                                                                                                                                                                                  |                                                                                                                                                                                                                                                                                                                                                                                                                                                                                                                                |    |      |                     |           |           |           |             |        |
|----|----|----------|----------|------------|-----|----|----|---|----|---|---|---|-----|----------------------------------------------------------------------------------------------------------------------------------------------------------------------------------------------------------------------------------------------------------------------------------|--------------------------------------------------------------------------------------------------------------------------------------------------------------------------------------------------------------------------------------------------------------------------------------------------------------------------------------------------------------------------------------------------------------------------------------------------------------------------------------------------------------------------------|----|------|---------------------|-----------|-----------|-----------|-------------|--------|
| 19 | 13 | 29978704 | 33640016 | CH1        | 609 | 16 | 2  | 0 | 8  | 2 | 0 | 0 | 0   | 637                                                                                                                                                                                                                                                                              | CUBN.NM_001192575:exon66:c.G10753A:p.A3585T,<br>CUBN.NM_001192575:exon64:c.A10277C:p.D3426A,<br>CUBN.NM_001192575:exon64:c.A10243G:p.N3415D,<br>CUBN.NM_001192575:exon61:c.G9813C:p.M3271I,<br>CUBN.NM_001192575:exon49:c.A7565G:p.K2522R,<br>CUBN.NM_001192575:exon27:c.C3860T:p.T1287I,<br>CUBN.NM_001192575:exon10:c.G1039A:p.V347I,<br>CUBN.NM_001192575:exon7:c.A667G:p.M223V,<br>STAM.NM_001078842:exon14:c.G1396A:p.V466I,<br>NSJUN6.NM_001083670:exon3:c.G779T:p.G260V,<br>ARHGAP12.NM_001102241:exon3:c.C353T:p.S118F | 11 | 0    | C13H10ORF97.ST8SIA6 | 2         | 0.2449956 | 30344377  | C13H10ORF97 | 207721 |
| 6  | 14 | 2989275  | 4736994  | homozygous | 0   | 0  | 0  | 0 | 0  | 0 | 0 | 0 | 0   | 0                                                                                                                                                                                                                                                                                | 0                                                                                                                                                                                                                                                                                                                                                                                                                                                                                                                              | 0  | 0    | 0                   | 0.308094  | 4302229   | LOC618755 | 283020      |        |
| 20 | 16 | 4274940  | 4718731  | CH1        | 2   | 0  | 0  | 0 | 0  | 0 | 0 | 0 | 2   | 0                                                                                                                                                                                                                                                                                | 0                                                                                                                                                                                                                                                                                                                                                                                                                                                                                                                              | 0  | 0    | 0                   | 0.2637076 | 4718731   | CFH       | 436500      |        |
| 21 | 16 | 5734127  | 8804868  | CH1        | 0   | 1  | 0  | 0 | 0  | 0 | 0 | 0 | 1   | R3HDM2.NM_001078034:exon1:c.C331A:p.Q111K,                                                                                                                                                                                                                                       | 1                                                                                                                                                                                                                                                                                                                                                                                                                                                                                                                              | 0  | 0    | 0.2741514           | 7693002   | R3HDM2    | 339647    |             |        |
| 45 | 16 | 60959039 | 64675532 | CH2        | 346 | 14 | 12 | 0 | 7  | 1 | 0 | 0 | 380 | DHX9.NM_174036:exon3:c.G247A:p.V83I,<br>TSEN15.NM_001076312:exon4:c.C395T:p.S132L                                                                                                                                                                                                | 2                                                                                                                                                                                                                                                                                                                                                                                                                                                                                                                              | 0  | 0    | 0.2645779           | 61058925  | RGLS1     | 19358     |             |        |
| 22 | 16 | 71569808 | 75644283 | CH1        | 326 | 12 | 1  | 1 | 4  | 9 | 0 | 0 | 353 | LOC510385.NM_001105352:exon6:c.A806G:p.N269S,<br>LOC511599.NM_001100341:exon2:c.T323G:p.F108C,<br>LOC511599.NM_001100341:exon2:c.C387G:p.F129L,<br>CD46.NM_183080:exon1:c.G98A:p.R33H,<br>CRB1.NM_001192482:exon6:c.C1205T:p.S402L,<br>CRB1.NM_001192482:exon9:c.A3694G:p.M1232V | 6                                                                                                                                                                                                                                                                                                                                                                                                                                                                                                                              | 1  | G0S2 | 1                   | 0.3255004 | 73743439  | CD34      | 32802       |        |
| 46 | 19 | 14279302 | 16900503 | CH2        | 661 | 4  | 4  | 0 | 5  | 0 | 0 | 0 | 674 | CCT6B.NM_001034642:exon11:c.C1250T:p.A417V,                                                                                                                                                                                                                                      | 1                                                                                                                                                                                                                                                                                                                                                                                                                                                                                                                              | 0  | 0    | 0.2715405           | 14700793  | CCT6B     | 83596     |             |        |
| 47 | 21 | 3827974  | 8618090  | CH2        | 82  | 1  | 2  | 0 | 1  | 0 | 0 | 0 | 86  | 0                                                                                                                                                                                                                                                                                | 0                                                                                                                                                                                                                                                                                                                                                                                                                                                                                                                              | 0  | 0    | 0.2719756           | 6360252   | TTC23     | 7723      |             |        |
| 23 | 21 | 65108809 | 68819863 | CH1        | 199 | 4  | 0  | 1 | 13 | 5 | 0 | 3 | 225 | TNFAIP2.NM_001191189:exon10:c.T1807G:p.S603A,                                                                                                                                                                                                                                    | 1                                                                                                                                                                                                                                                                                                                                                                                                                                                                                                                              | 1  | 0    | 0.2576153           | 65990702  | MIR379    | 10034     |             |        |
| 48 | 22 | 9665482  | 11980868 | CH2        | 135 | 4  | 1  | 0 | 2  | 2 | 0 | 0 | 144 | DLEC1.NM_001193198:exon19:c.A2786G:p.Q929R,                                                                                                                                                                                                                                      | 1                                                                                                                                                                                                                                                                                                                                                                                                                                                                                                                              | 0  | 0    | 0.2597911           | 11980868  | ACVR2B    | 7208      |             |        |
| 7  | 24 | 32645084 | 44168238 | homozygous | 19  | 2  | 1  | 0 | 0  | 0 | 0 | 0 | 22  | DLGAP1.NM_001192629:exon1:c.C214T:p.R72W,                                                                                                                                                                                                                                        | 1                                                                                                                                                                                                                                                                                                                                                                                                                                                                                                                              | 0  | 0    | 0.3559617           | 35443082  | MIR1-2    | 136145    |             |        |
| 49 | 24 | 44255627 | 44255627 | CH2        | 0   | 0  | 0  | 0 | 0  | 0 | 0 | 0 | 0   | 0                                                                                                                                                                                                                                                                                | 0                                                                                                                                                                                                                                                                                                                                                                                                                                                                                                                              | 0  | 0    | 0                   | 0.2872063 | 44255627  | GNAL      | 12396       |        |
| 24 | 24 | 44306145 | 45601084 | CH1        | 0   | 0  | 0  | 0 | 0  | 0 | 0 | 0 | 0   | 0                                                                                                                                                                                                                                                                                | 0                                                                                                                                                                                                                                                                                                                                                                                                                                                                                                                              | 0  | 0    | 0                   | 0.243255  | 44567434  | CEP76     | 88452       |        |
| 8  | 24 | 45664478 | 47069405 | homozygous | 1   | 0  | 0  | 0 | 0  | 0 | 0 | 0 | 1   | 0                                                                                                                                                                                                                                                                                | 0                                                                                                                                                                                                                                                                                                                                                                                                                                                                                                                              | 0  | 0    | 0                   | 0.3220191 | 45664478  | TNIP2     | 191481      |        |
| 25 | 24 | 47123716 | 49539373 | CH1        | 57  | 0  | 1  | 0 | 2  | 1 | 0 | 0 | 61  | 0                                                                                                                                                                                                                                                                                | 0                                                                                                                                                                                                                                                                                                                                                                                                                                                                                                                              | 0  | 0    | 0                   | 0.2789382 | 47123716  | SIGLEC15  | 7118        |        |

Totals: 12570 293 183 29 252 229 4 5 13565 136  
Grand total: 13079

In yellow are intervals where allele frequencies differ in descendants and non-descendants of Chief (see Figure S7 for visualization and Table S8 for the list).

**Table S8. Genes within 32 regions with the frequency of Chief alleles different between descendants and non-descendants**

| Region no. | chr | start     | end       | No. intron SNPs | No. exon SNPs | No. 3'UTR SNPs | No. 5'UTR SNPs | No. down stream SNPs | No. up stream SNPs | No. ncRNA SNPs | No. updown stream SNPs | Total gene related SNPs | Gene/Non-syn. SNPs                                                                                                                                                                                                                                                                                                                                                                                                                                                                                                                                                                                                                                                | No. non-syn. SNPs | Gene/5'UTR SNPs         | No. 5'UTR SNPs | Gene/3'UTR SNPs                                                                                                                        | No. 3'UTR SNPs | Highest Significance Value (SNP50) | Bp of the SNP with highest significance value | Gene, closest to the highest significance SNP | Distance between the gene and the highest significance SNP |
|------------|-----|-----------|-----------|-----------------|---------------|----------------|----------------|----------------------|--------------------|----------------|------------------------|-------------------------|-------------------------------------------------------------------------------------------------------------------------------------------------------------------------------------------------------------------------------------------------------------------------------------------------------------------------------------------------------------------------------------------------------------------------------------------------------------------------------------------------------------------------------------------------------------------------------------------------------------------------------------------------------------------|-------------------|-------------------------|----------------|----------------------------------------------------------------------------------------------------------------------------------------|----------------|------------------------------------|-----------------------------------------------|-----------------------------------------------|------------------------------------------------------------|
| 1          | 1   | 67755812  | 76434294  | 686             | 10            | 7              | 4              | 4                    | 14                 | 0              | 0                      | 725                     | CCDC14.NM_001105469:exon1:c.A775G;p.N259D, LMP5.NM_177508:exon3:c.C541T;p.R181C, ITGB5.NM_174679:exon13:c.C2089G;p.Q697E, BDH1.NM_001034600:exon5:c.C368T;p.A123V, CPN2.NM_001101232:exon2:c.T995C;p.V332A                                                                                                                                                                                                                                                                                                                                                                                                                                                        | 5                 | TNK2,OSTALPHA,MF12,BDH1 | 4              | ITGB5,ITGB5,ITGB5,ITGB5,ITGB5,APOD,CPN2                                                                                                | 7              | 0.000790396                        | 68371871                                      | DIRC2                                         | 74583                                                      |
| 2          | 1   | 79972527  | 80938504  | 78              | 6             | 0              | 0              | 0                    | 0                  | 0              | 0                      | 84                      | LPP.NM_001192591:exon7:c.G910A;p.A304T                                                                                                                                                                                                                                                                                                                                                                                                                                                                                                                                                                                                                            | 1                 |                         | 0              | 0                                                                                                                                      | 0.000917886    | 79972527                           | TPRG1                                         | 68501                                         |                                                            |
| 3          | 3   | 32874728  | 33402672  | 14              | 1             | 2              | 1              | 0                    | 1                  | 0              | 0                      | 19                      | ST7L.NM_001083481:exon1:c.C74T;p.P25L                                                                                                                                                                                                                                                                                                                                                                                                                                                                                                                                                                                                                             | 1                 | CTTNBP2NL               | 1              | CAPZA1,CTTNBP2NL                                                                                                                       | 2              | 0.000870123                        | 33402672                                      | CTTNBP2NL                                     | 8145                                                       |
| 4          | 3   | 38753131  | 39339310  | 91              | 0             | 0              | 0              | 0                    | 0                  | 0              | 0                      | 91                      |                                                                                                                                                                                                                                                                                                                                                                                                                                                                                                                                                                                                                                                                   | 0                 |                         | 0              | 0                                                                                                                                      | 0.000874784    | 38753131                           | MGC139448                                     | 65598                                         |                                                            |
| 5          | 4   | 49699919  | 60292651  | 738             | 12            | 7              | 0              | 5                    | 6                  | 0              | 0                      | 768                     | HBP1.NM_001046196:exon7:c.G761A;p.G254D, SLC26A3.NM_001083676:exon5:c.G466A;p.A156T, CFTR.NM_174018:exon11:c.A1402T;p.M468L, CFTR.NM_174018:exon9:c.G1185T;p.E395D                                                                                                                                                                                                                                                                                                                                                                                                                                                                                                | 4                 |                         | 0              |                                                                                                                                        | 7              | 0.000505471                        | 50062728                                      | PIK3CG                                        | 79565                                                      |
| 6          | 4   | 80698120  | 83032965  | 17              | 0             | 1              | 0              | 0                    | 0                  | 0              | 0                      | 16                      |                                                                                                                                                                                                                                                                                                                                                                                                                                                                                                                                                                                                                                                                   | 0                 |                         | 0              | 0                                                                                                                                      | 0.000699175    | 83032965                           | LOC100125578                                  | 52100                                         |                                                            |
| 7          | 5   | 36051712  | 36173811  | 0               | 0             | 0              | 0              | 0                    | 0                  | 0              | 0                      | 0                       |                                                                                                                                                                                                                                                                                                                                                                                                                                                                                                                                                                                                                                                                   | 0                 |                         | 0              | 0                                                                                                                                      | 7.69E-05       | 36173811                           | FAM113B                                       | 53698                                         |                                                            |
| 8          | 5   | 73892593  | 77167629  | 255             | 1             | 5              | 1              | 4                    | 8                  | 0              | 0                      | 274                     |                                                                                                                                                                                                                                                                                                                                                                                                                                                                                                                                                                                                                                                                   | 0                 | MGC137014               | 1              | TCP1L2,C5H12orf23,PWP1,FBXO7,MGC137014                                                                                                 | 5              | 0.00044741                         | 73964925                                      | LOC100270756                                  | 71498                                                      |
| 9          | 5   | 92502082  | 94578774  | 249             | 1             | 0              | 0              | 0                    | 1                  | 0              | 0                      | 251                     |                                                                                                                                                                                                                                                                                                                                                                                                                                                                                                                                                                                                                                                                   | 0                 |                         | 0              | 0                                                                                                                                      | 0.000888919    | 94578774                           | CMAS                                          | 13022                                         |                                                            |
| 10         | 5   | 104022455 | 107367506 | 210             | 26            | 20             | 4              | 32                   | 38                 | 0              | 0                      | 330                     | GPRC5A.NM_001034515:exon2:c.A268G;p.N90D, GPRC5A.NM_001034515:exon2:c.A256G;p.I86V, STYK1.NM_001143868:exon7:c.C856T;p.R286C, KLRA1.NM_174376:exon4:c.T250C;p.W84R, KLRA1.NM_174376:exon5:c.C503A;p.A168D, KLRA1.NM_174376:exon5:c.T536C;p.I179T, KLRA1.NM_174376:exon5:c.A500G;p.N184D, KLRA1.NM_174376:exon5:c.G557C;p.C186S, KLRA1.NM_174376:exon7:c.C697A;p.H233N, KLRA1.NM_174376:exon7:c.A783C;p.K261N, KLRA1.NM_001002884:exon8:c.A707G;p.H236R, NKG2C.NM_001098163:exon1:c.C14T;p.T5M, NKG2C.NM_001098163:exon1:c.A32C;p.Q11P, NKG2C.NM_001098163:exon2:c.A86G;p.Q29R, NKG2C.NM_001098163:exon2:c.C134T;p.T45M, CLEC7A.NM_001031852:exon5:c.A589G;p.S197G | 16                | KLRA1,KLRA1,KLRA1,KLRA1 | 4              |                                                                                                                                        | 20             | 0.000820483                        | 10528653                                      | ETV6                                          | 58718                                                      |
| 11         | 5   | 115473164 | 115509870 | 0               | 0             | 0              | 0              | 0                    | 0                  | 0              | 0                      | 0                       |                                                                                                                                                                                                                                                                                                                                                                                                                                                                                                                                                                                                                                                                   | 0                 |                         | 0              | 0                                                                                                                                      | 0.000608795    | 115509870                          | DCP1B                                         | 242872                                        |                                                            |
| 12         | 5   | 120911371 | 121661107 | 64              | 1             | 0              | 0              | 3                    | 3                  | 0              | 0                      | 71                      | PARVB.NM_001102299:exon4:c.C386T;p.P129L                                                                                                                                                                                                                                                                                                                                                                                                                                                                                                                                                                                                                          | 1                 |                         | 0              | 0                                                                                                                                      | 0.000874784    | 121661107                          | PARVG                                         | 67179                                         |                                                            |
| 13         | 5   | 122735170 | 125588039 | 384             | 6             | 3              | 0              | 6                    | 1                  | 1              | 0                      | 401                     | LOC537386.NM_001076033:exon2:c.C20A;p.R7Q, TTC38.NM_001105259:exon7:c.G622T;p.A208S                                                                                                                                                                                                                                                                                                                                                                                                                                                                                                                                                                               | 2                 |                         | 0              | FBLN1,PPARA,LOC537366                                                                                                                  | 3              | 0.00082929                         | 124715380                                     | TBC1D22A                                      | 556275                                                     |
| 14         | 6   | 41506939  | 42838773  | 28              | 0             | 0              | 0              | 2                    | 3                  | 0              | 0                      | 33                      |                                                                                                                                                                                                                                                                                                                                                                                                                                                                                                                                                                                                                                                                   | 0                 |                         | 0              | 0                                                                                                                                      | 0.000824875    | 41506939                           | KCNIP4                                        | 15976                                         |                                                            |
| 15         | 6   | 54699009  | 57806018  | 0               | 0             | 0              | 0              | 0                    | 0                  | 0              | 0                      | 0                       |                                                                                                                                                                                                                                                                                                                                                                                                                                                                                                                                                                                                                                                                   | 0                 |                         | 0              | 0                                                                                                                                      | 0.000568133    | 54699009                           | PCDH7                                         | 2698188                                       |                                                            |
| 16         | 6   | 62196908  | 67395437  | 435             | 8             | 2              | 0              | 0                    | 2                  | 0              | 0                      | 447                     | APBB2.NM_001076847:exon4:c.A541C;p.N181H, GABRG1.NM_001101250:exon1:c.T48G;p.N16K                                                                                                                                                                                                                                                                                                                                                                                                                                                                                                                                                                                 | 2                 |                         | 0              | GABRG1,GABRG1                                                                                                                          | 2              | 0.000670006                        | 67244198                                      | GABRA2                                        | 45275                                                      |
| 17         | 6   | 90184757  | 97005042  | 431             | 11            | 20             | 0              | 14                   | 13                 | 0              | 0                      | 489                     | COX18.NM_001082437:exon1:c.G56A;p.R19H, SCARB2.NM_001102153:exon6:c.G785A;p.R262K                                                                                                                                                                                                                                                                                                                                                                                                                                                                                                                                                                                 | 2                 |                         | 0              | IL3,ROHY1,ROHY1,THAP6,THAP6,CXCL10, CXCL10,SCARB2,SCARB2,SCARB2,SCARB2, SCARB2,SCARB2,SCARB2,SCARB2,CXCL13, CNOT6L,CNOT6L,CNOT6L,MRPL1 | 20             | 0.00089847                         | 91417374                                      | ALB                                           | 43790                                                      |
| 18         | 9   | 99911918  | 103251233 | 1105            | 4             | 1              | 0              | 3                    | 0                  | 0              | 0                      | 1113                    | PLG.NM_173951:exon12:c.C1549A;p.P517T                                                                                                                                                                                                                                                                                                                                                                                                                                                                                                                                                                                                                             | 1                 |                         | 0              | IGF2R                                                                                                                                  | 1              | 0.000932726                        | 100524835                                     | PLG                                           | 50901                                                      |
| 19         | 10  | 13369708  | 15006348  | 36              | 0             | 0              | 0              | 1                    | 2                  | 0              | 0                      | 39                      |                                                                                                                                                                                                                                                                                                                                                                                                                                                                                                                                                                                                                                                                   | 0                 |                         | 0              | 0                                                                                                                                      | 0.00078619     | 15006348                           | FEM1B                                         | 71452                                         |                                                            |
| 20         | 10  | 56596773  | 57638140  | 0               | 0             | 0              | 0              | 0                    | 0                  | 0              | 0                      | 0                       |                                                                                                                                                                                                                                                                                                                                                                                                                                                                                                                                                                                                                                                                   | 0                 |                         | 0              | 0                                                                                                                                      | 0.000903285    | 57638140                           | BANF1                                         | 720256                                        |                                                            |
| 21         | 10  | 63023941  | 63201598  | 0               | 0             | 0              | 0              | 0                    | 0                  | 0              | 0                      | 0                       |                                                                                                                                                                                                                                                                                                                                                                                                                                                                                                                                                                                                                                                                   | 0                 |                         | 0              | 0                                                                                                                                      | 0.000571161    | 63170778                           | FBN1                                          | 162234                                        |                                                            |
| 22         | 11  | 92077934  | 92609678  | 0               | 0             | 0              | 0              | 0                    | 0                  | 0              | 0                      | 0                       |                                                                                                                                                                                                                                                                                                                                                                                                                                                                                                                                                                                                                                                                   | 0                 |                         | 0              | 0                                                                                                                                      | 0.000484459    | 92466053                           | RSAD2                                         | 394071                                        |                                                            |



|              |    |          |          |      |     |     |    |     |     |   |   |                     |                                                                                                                                                                                                                                                                                                                                                                                                                                                                                                                                                                                                                                                                                                                                                                                                                                                                                                                                                                                               |    |       |                                                                   |    |             |          |            |        |      |  |  |  |  |  |  |  |  |  |
|--------------|----|----------|----------|------|-----|-----|----|-----|-----|---|---|---------------------|-----------------------------------------------------------------------------------------------------------------------------------------------------------------------------------------------------------------------------------------------------------------------------------------------------------------------------------------------------------------------------------------------------------------------------------------------------------------------------------------------------------------------------------------------------------------------------------------------------------------------------------------------------------------------------------------------------------------------------------------------------------------------------------------------------------------------------------------------------------------------------------------------------------------------------------------------------------------------------------------------|----|-------|-------------------------------------------------------------------|----|-------------|----------|------------|--------|------|--|--|--|--|--|--|--|--|--|
| 23           | 16 | 60958039 | 64502613 | 293  | 14  | 12  | 0  | 7   | 1   | 0 | 0 | 327                 | DHX9.NM_174036.exon3:c.G247A:p.V83I,<br>TSEN15.NM_001076312.exon4:c.C395T:p.S132L                                                                                                                                                                                                                                                                                                                                                                                                                                                                                                                                                                                                                                                                                                                                                                                                                                                                                                             | 2  | 0     | GLUL,GLUL,GLUL,GLUL,GLUL,GLUL,GLUL,GLUL,<br>GLUL,GLUL,SMG7,TSEN15 | 12 | 0.000908125 | 64502613 | HMCN1      | 50137  |      |  |  |  |  |  |  |  |  |  |
| 24           | 16 | 73117624 | 74126360 | 8    | 1   | 0   | 0  | 0   | 2   | 0 | 0 | 11                  | CD46.NM_183080.exon1:c.G98A:p.R33H                                                                                                                                                                                                                                                                                                                                                                                                                                                                                                                                                                                                                                                                                                                                                                                                                                                                                                                                                            | 1  | 0     |                                                                   | 0  | 0.000874784 | 74126360 | F13B       | 124904 |      |  |  |  |  |  |  |  |  |  |
| 25           | 16 | 75441234 | 75566135 | 0    | 0   | 0   | 0  | 0   | 0   | 0 | 0 | 0                   |                                                                                                                                                                                                                                                                                                                                                                                                                                                                                                                                                                                                                                                                                                                                                                                                                                                                                                                                                                                               | 0  | 0     |                                                                   | 0  | 0.000521833 | 75566135 | LHX9       | 348133 |      |  |  |  |  |  |  |  |  |  |
| 26           | 23 | 27078160 | 28890490 | 330  | 45  | 28  | 1  | 29  | 23  | 0 | 0 | 457                 | TNXB.NM_174703.exon2:c.C167T:p.A56V,<br>TNXB.NM_174703.exon3:c.C500T:p.A167V,<br>TNXB.NM_174703.exon5:c.G1249C:p.E417Q,<br>G7C.NM_001075206.exon2:c.T25C:p.C9R,<br>LY6G6F.NM_001076194.exon3:c.C392T:p.S131F,<br>GPANK1.NM_001076468.exon3:c.C224T:p.T75M,<br>TUBB2B.NM_001046549.exon4:c.A959G:p.Q320R,<br>BOLA.NM_001040532.exon6:c.A970G:p.T324A,<br>BOLA.NM_001038518.exon5:c.A995G:p.H332R,<br>BOLA.NM_001040532.exon5:c.A710G:p.E237G,<br>BOLA.NM_001040532.exon4:c.T546G:p.S182R,<br>BOLA.NM_001038518.exon3:c.T571G:p.W191G,<br>BOLA.NM_001040532.exon4:c.G535A:p.G179S,<br>BOLA.NM_001038518.exon3:c.G560A:p.R187Q,<br>BOLA.NM_001038518.exon3:c.C559G:p.R187G,<br>BOLA.NM_001038518.exon3:c.C538T:p.R180C,<br>BOLA.NM_001040532.exon4:c.G511C:p.D171H,<br>BOLA.NM_001038518.exon3:c.G536C:p.R179T,<br>BOLA.NM_001038518.exon3:c.G526A:p.E176K,<br>BOLA.NM_001040532.exon4:c.G499A:p.V167M,<br>BOLA.NM_001038518.exon3:c.G524A:p.G175D,<br>TRIM40.NM_001103306.exon2:c.C316A:p.P106T | 17 | CLIC1 | 1                                                                 | 28 | 0.000842681 | 28890490 | MOG        | 3064   |      |  |  |  |  |  |  |  |  |  |
| 27           | 23 | 31741848 | 32015190 | 1    | 0   | 0   | 0  | 1   | 2   | 0 | 0 | 4                   |                                                                                                                                                                                                                                                                                                                                                                                                                                                                                                                                                                                                                                                                                                                                                                                                                                                                                                                                                                                               | 0  | 0     |                                                                   | 0  | 0.000893682 | 32015190 | H4         | 8438   |      |  |  |  |  |  |  |  |  |  |
| 28           | 23 | 34410374 | 34469180 | 0    | 0   | 0   | 0  | 0   | 0   | 0 | 0 | 0                   |                                                                                                                                                                                                                                                                                                                                                                                                                                                                                                                                                                                                                                                                                                                                                                                                                                                                                                                                                                                               | 0  | 0     |                                                                   | 0  | 0.000452179 | 34469180 | PRP4       | 341198 |      |  |  |  |  |  |  |  |  |  |
| 29           | 24 | 26339920 | 26339920 | 0    | 0   | 0   | 0  | 0   | 0   | 0 | 0 | 0                   |                                                                                                                                                                                                                                                                                                                                                                                                                                                                                                                                                                                                                                                                                                                                                                                                                                                                                                                                                                                               | 0  | 0     |                                                                   | 0  | 0.000737449 | 26339920 | RNF138     | 140089 |      |  |  |  |  |  |  |  |  |  |
| 30           | 24 | 44255627 | 44255627 | 0    | 0   | 0   | 0  | 0   | 0   | 0 | 0 | 0                   |                                                                                                                                                                                                                                                                                                                                                                                                                                                                                                                                                                                                                                                                                                                                                                                                                                                                                                                                                                                               | 0  | 0     |                                                                   | 0  | 0.00083373  | 44255627 | GNAL       | 12396  |      |  |  |  |  |  |  |  |  |  |
| 31           | 24 | 47123716 | 49539373 | 57   | 0   | 1   | 0  | 2   | 1   | 0 | 0 | 61                  |                                                                                                                                                                                                                                                                                                                                                                                                                                                                                                                                                                                                                                                                                                                                                                                                                                                                                                                                                                                               | 0  | 0     | IER3IP1,                                                          | 1  | 0.00078619  | 49539373 | SMAD2      | 128612 |      |  |  |  |  |  |  |  |  |  |
| 32           | 27 | 26021842 | 26545747 | 0    | 0   | 0   | 0  | 0   | 0   | 0 | 0 | 0                   |                                                                                                                                                                                                                                                                                                                                                                                                                                                                                                                                                                                                                                                                                                                                                                                                                                                                                                                                                                                               | 0  | 0     |                                                                   | 0  | 0.000710441 | 26149598 | C27H8ORF79 | 94517  |      |  |  |  |  |  |  |  |  |  |
| <b>Total</b> |    |          |          | 5510 | 147 | 109 | 11 | 113 | 121 | 1 | 0 | 6013                |                                                                                                                                                                                                                                                                                                                                                                                                                                                                                                                                                                                                                                                                                                                                                                                                                                                                                                                                                                                               | 55 |       |                                                                   |    |             |          |            |        |      |  |  |  |  |  |  |  |  |  |
|              |    |          |          |      |     |     |    |     |     |   |   | <b>Grand total:</b> |                                                                                                                                                                                                                                                                                                                                                                                                                                                                                                                                                                                                                                                                                                                                                                                                                                                                                                                                                                                               |    |       |                                                                   |    |             |          |            |        | 5779 |  |  |  |  |  |  |  |  |  |

In yellow are intervals overlapping with the 49 selected regions (see Table S7).

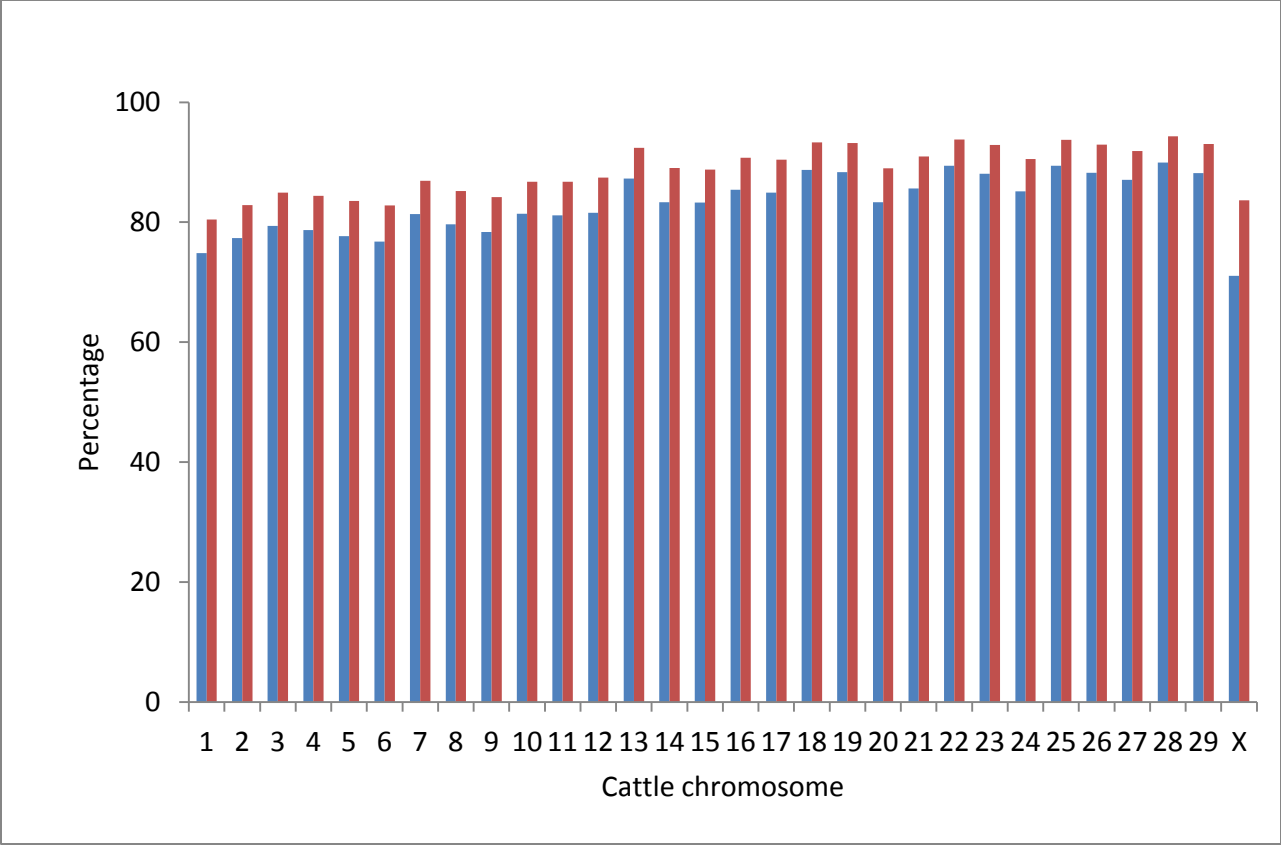

**Figure S1.** Coverage (percentage) of the reference chromosomes with Mark (red) and Chief (blue) reads for the intervals that had reads mapped by BLAT or Newbler.

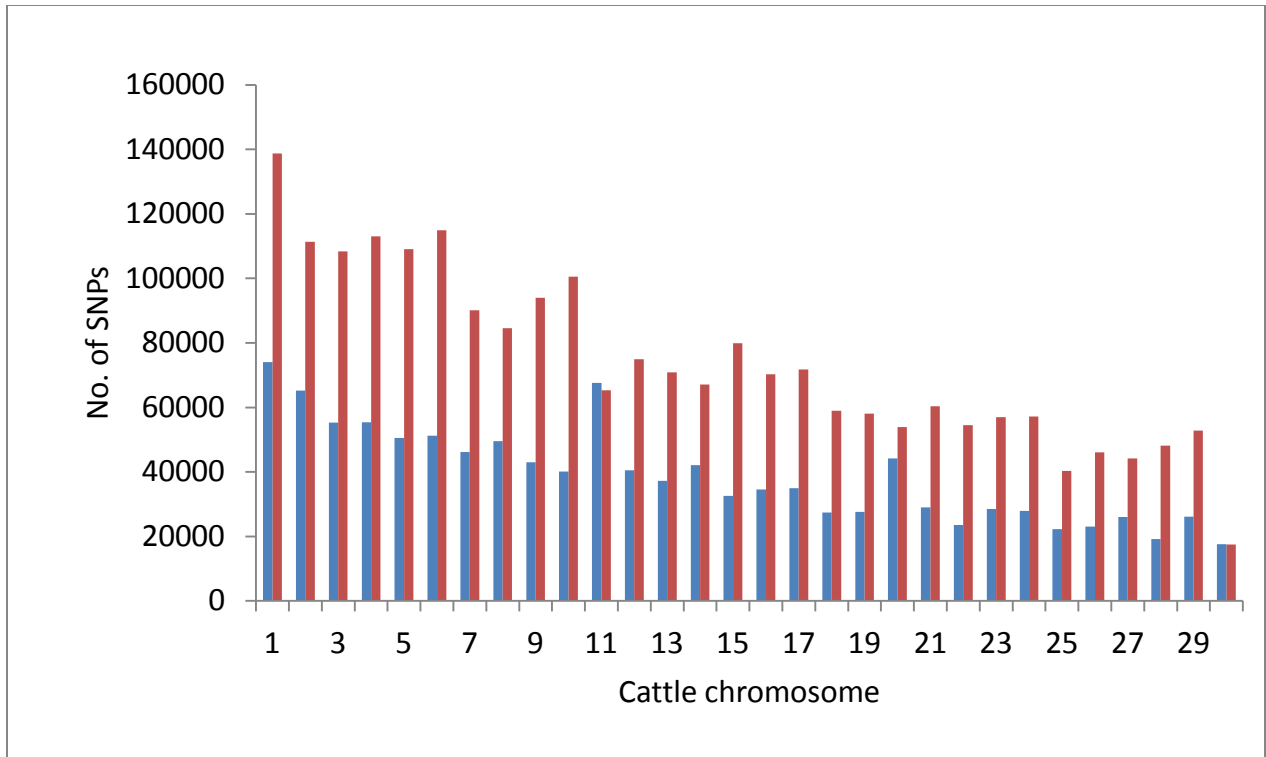

**Figure S2.** Distribution of high-quality Mark and Chief in silico SNPs across reference bovine chromosomes. In red is shown the distribution of SNPs heterozygous in at least one individual and in blue are SNPs that are homozygous in both sires for an allele different from the reference genome (Btau 4.0).

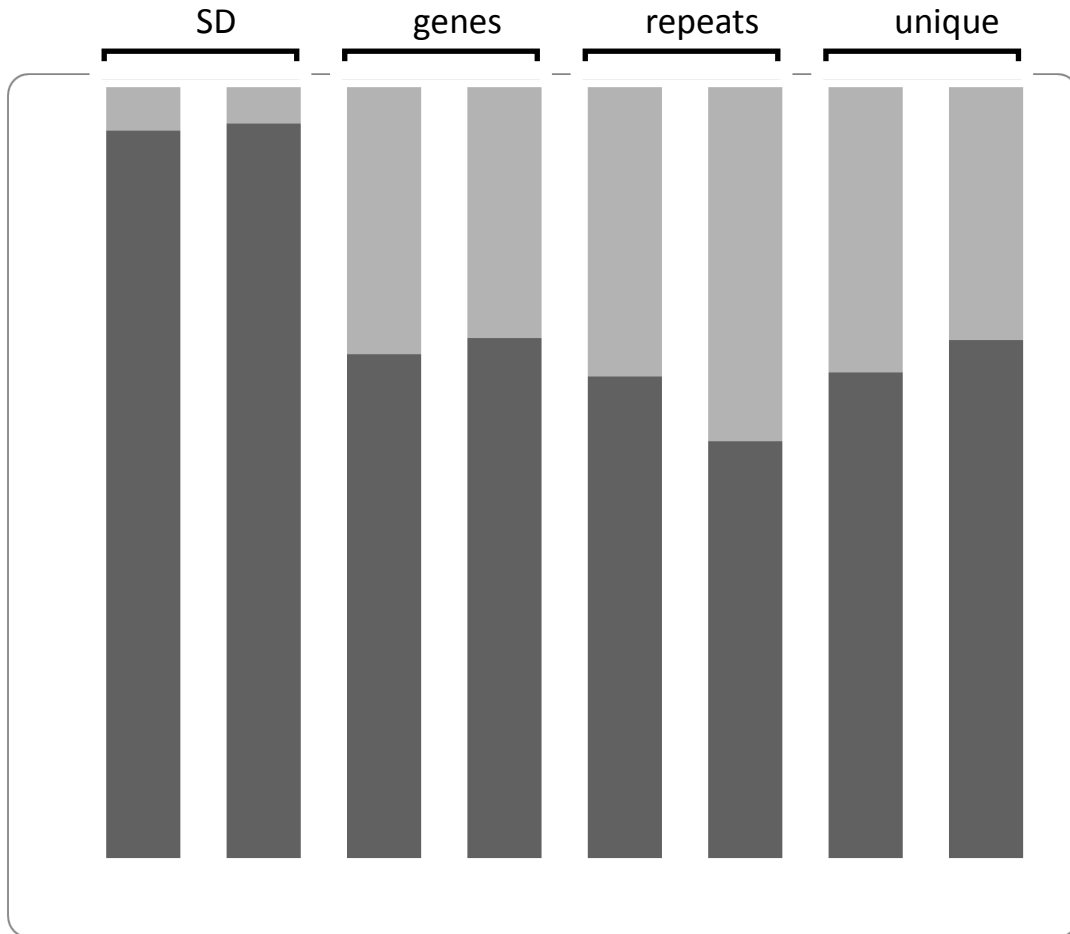

**Figure S3.** The reference Btau4.0 genome was divided into four classes: genes, unique, segmental duplications (SD), and repetitive elements. The GLEAN gene prediction collection defined the genes. RepeatMasker output defined the repetitive element category. The whole-genome SD from Liu et al., 2009 defined duplications. All remaining sequence was designated “unique.” An overlap between the filtered set of SNPs homozygous in two bulls and SNPs heterozygous in the bulls was calculated for each class separately and shown (lighter gray) as the percentage of the total number of heterozygous and homozygous SNPs.

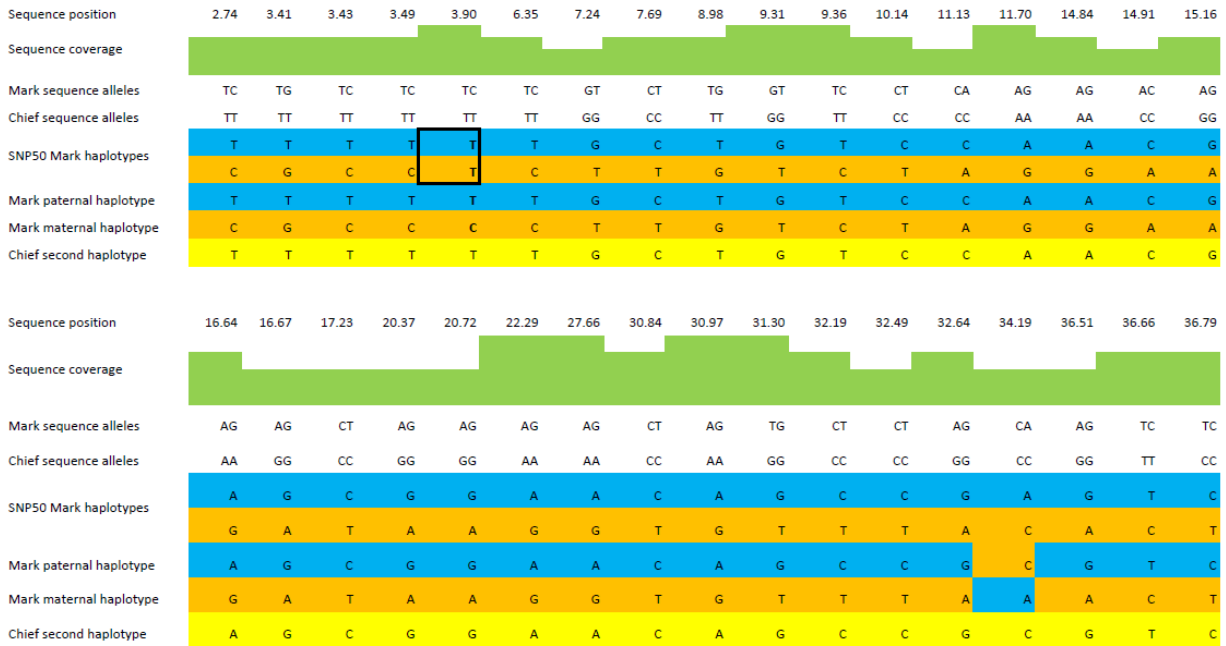

**Figure S4.** Reconstruction of Mark and Chief haplotypes from the sequence data and comparison to Mark haplotypes inferred from the genotyping of his 92 offspring. An example shows BTA2 position 2.74-36.79 Mbp. For simplicity only SNPs that overlap between the sequence data and the SNP50 Illumina Bovine array are shown. Coverage track indicates variation in coverage within the interval; sequence allele track shows the alleles that were detected in the filtered set of SNPs. Mark haplotypes are shown based on the genotyping reconstruction and the sequence data reconstruction. Differences between the two reconstructions are caused by a probable miss of alleles: one at 3.90 Mbp and another at 34.19 Mbp in Chief's sequence data. In both cases discrepancies between the sequence data and genotyping data result in differences between Mark haplotypes resolved by two independent methods.

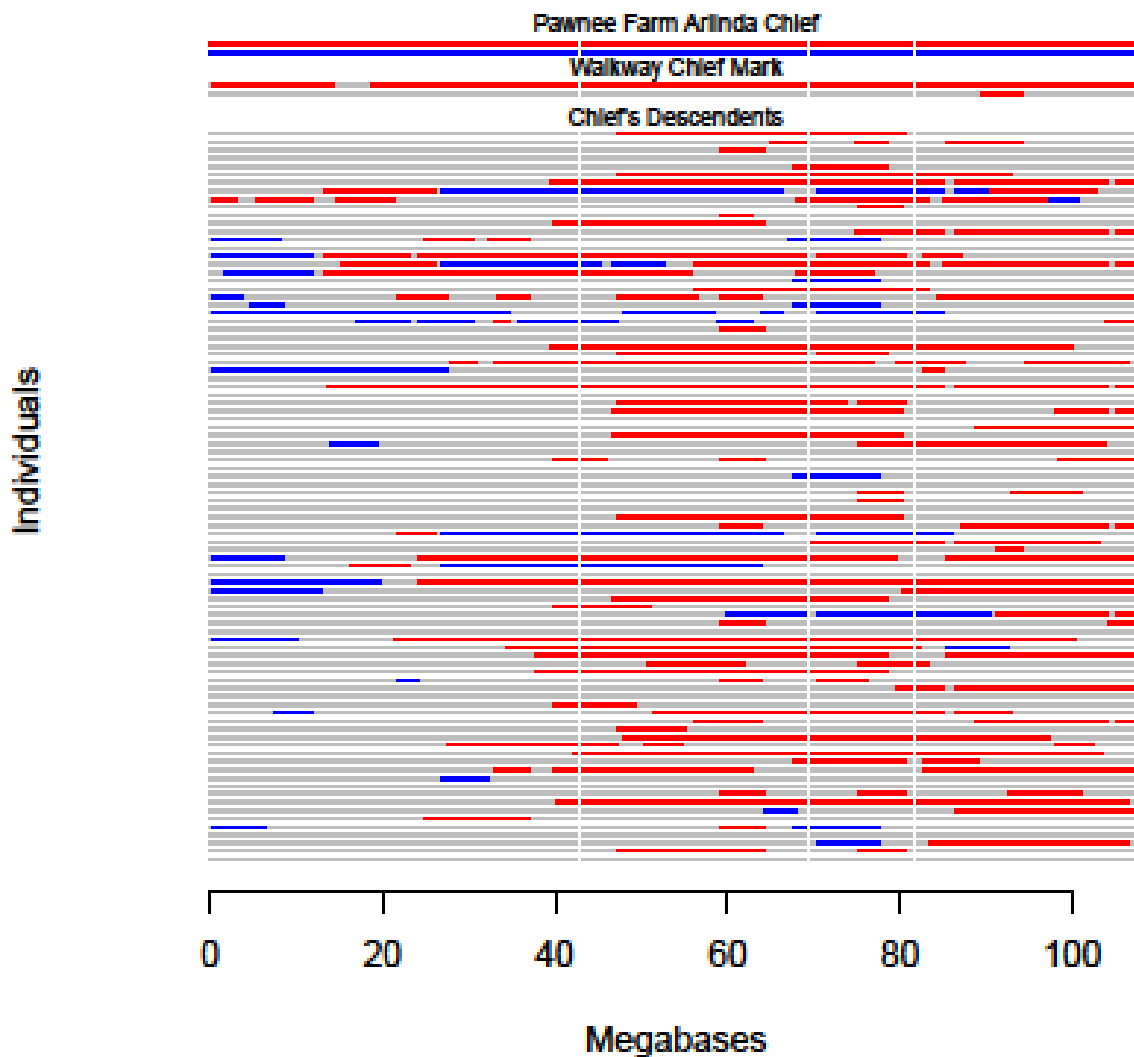

**Figure S5.** BTA9. Segments in common between Chief, his son Mark, and 50 of Chief's direct descendents in the current Holstein population (at least six generations removed) determined using the chromoPhase algorithm. Chief haplotype 1 segments are in red and the alternative haplotype is in blue. Each pair of lines represents alternative haplotypes of an individual. In gray are descendent haplotypes different from either of Chief's haplotype.

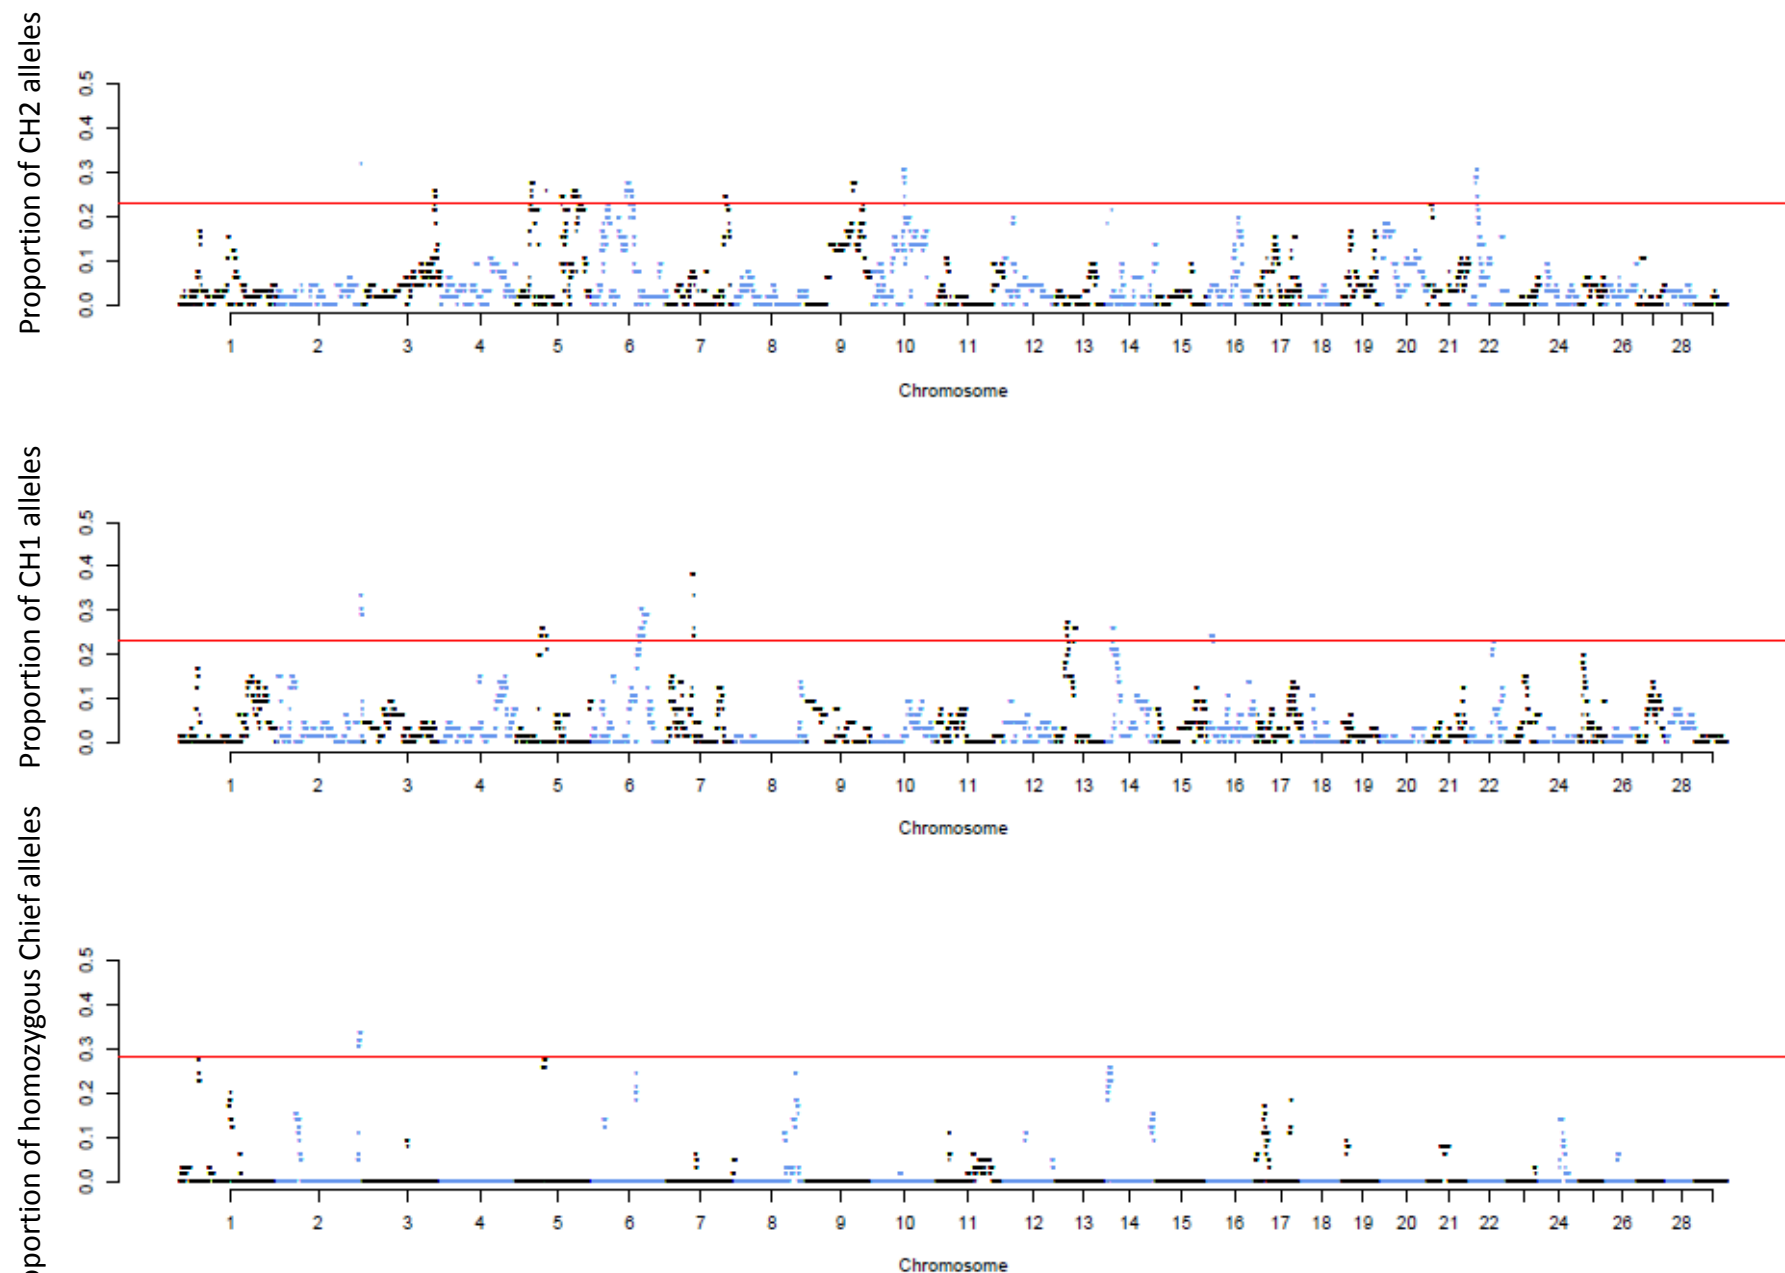

**Figure S6.** Proportion of alleles present in Chief haplotypes CH1, CH2, or homozygous in Chief's genome in the set of 33 Holstein individuals unrelated to Chief. Red line indicates a threshold at which the fraction of SNPs present in Chief genome could be explained by a random distribution in individuals unrelated to Chief.

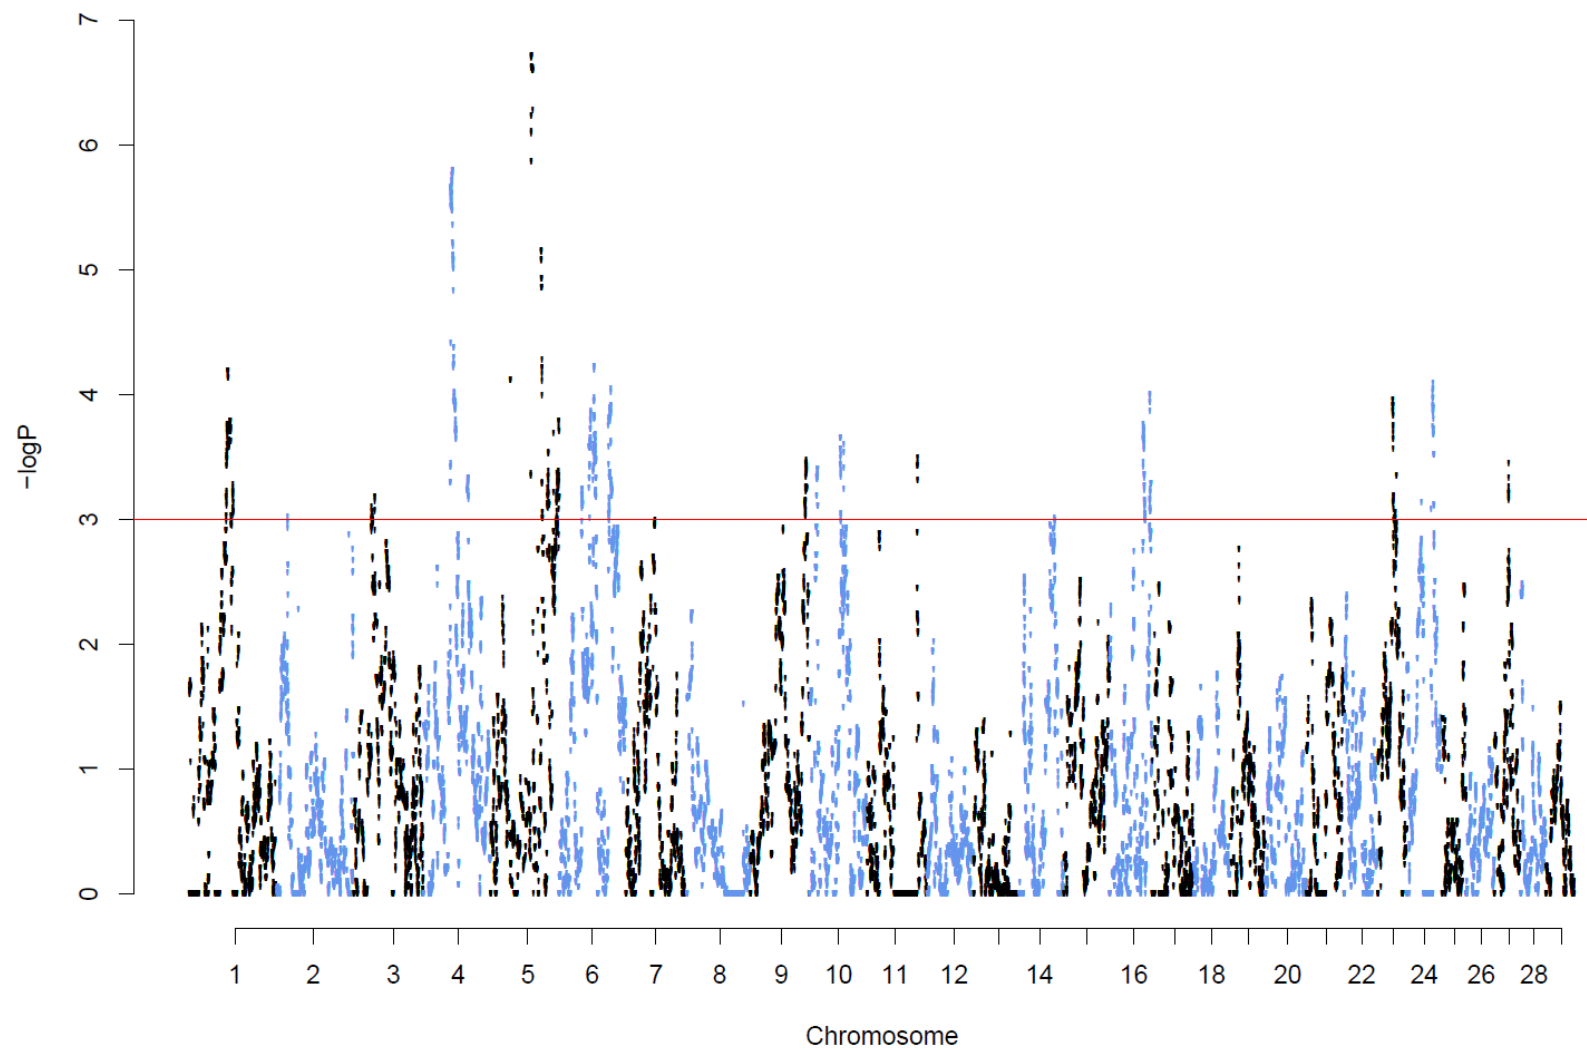

**Figure S7.** A plot of the  $-\text{Log}_{10}(\text{P-values})$  of the interaction term from the linear model for allele frequency difference between Chief descendants and non-descendants.



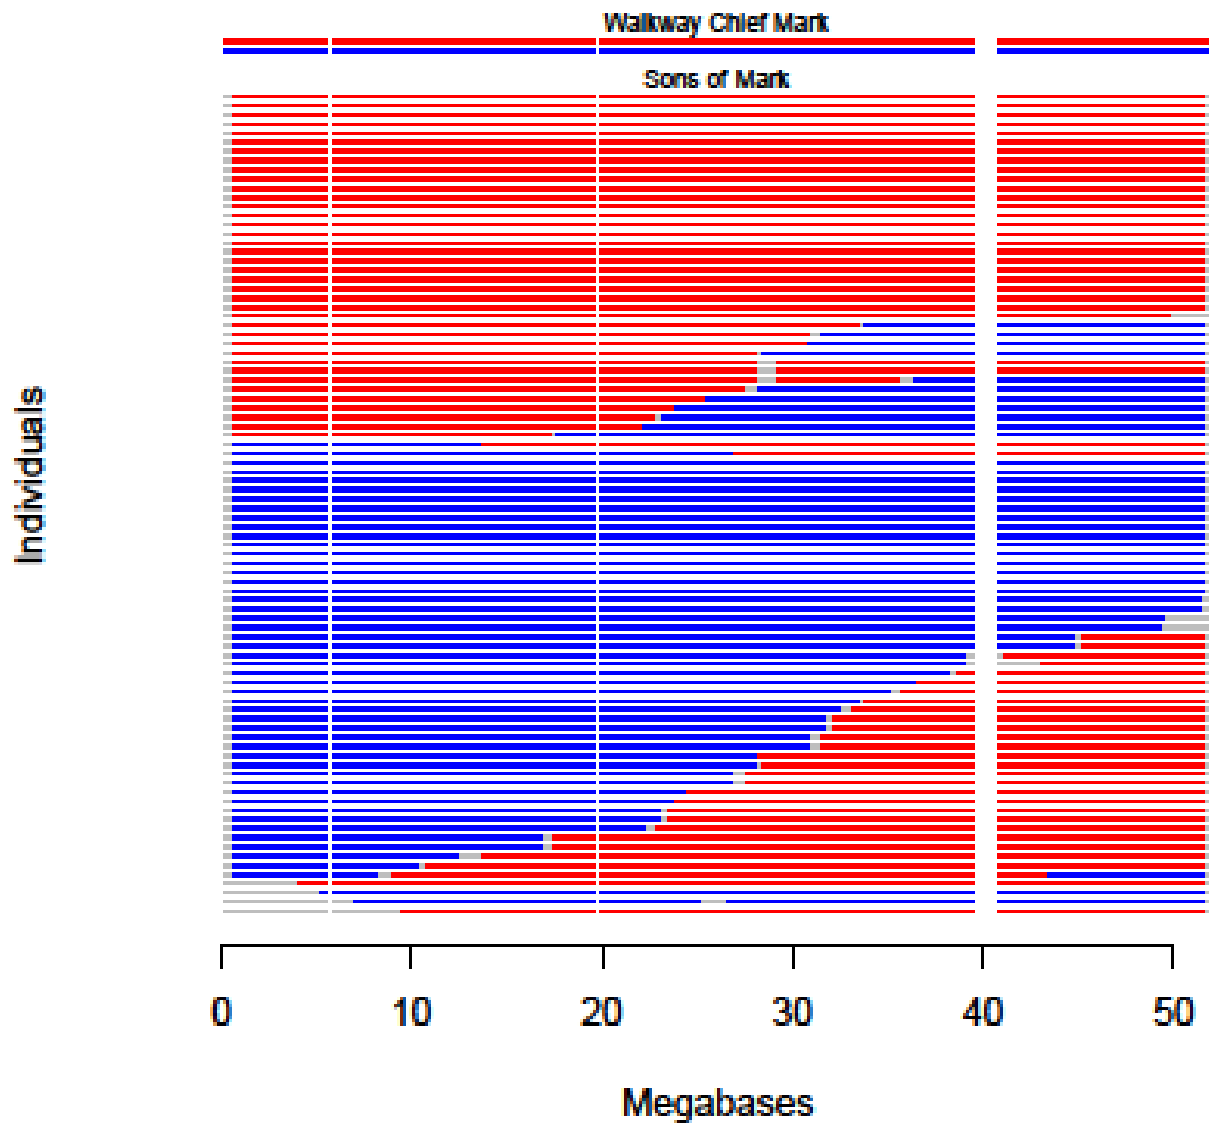

**Figure S8.** BTA29. Segments in common between Mark, and 92 of his sons' paternally-inherited chromosomes. Mark's paternal (Chief's) segments are in red and Mark's maternal segments are in blue. Each line represents a paternally-inherited haplotype of a son.

## References

1. Marth GT, *et al.* (1999) A general approach to single-nucleotide polymorphism discovery. *Nat Genet* 23:452-456.
2. Chevreux B, *et al.* (2004) Using the miraEST assembler for reliable and automated mRNA transcript assembly and SNP detection in sequenced ESTs. *Genome Res* 14:1147-1159.
3. Zimin AV, *et al.* (2009) A whole-genome assembly of the domestic cow, *Bos taurus*. *Genome Biol* 10:R42.
